1 **Diversity of free-living prokaryotes on terrestrial and marine Antarctic habitats**

2

3 Amanda Gonçalves Bendia<sup>1\*</sup>, Julio Cezar Fornazier Moreira<sup>1</sup>, Juliana Correa Neiva Ferreira<sup>1</sup>,  
4 Renato Gamba Romano<sup>1</sup>, Ivan Gonçalves de Castro Ferreira<sup>1</sup>, Diego Castillo Franco<sup>1</sup>, Heitor  
5 Evangelista<sup>2</sup>, Rosalinda Carmela Montone<sup>3</sup>, Vivian Helena Pellizari<sup>1</sup>

6

7 <sup>1</sup>Departamento de Oceanografia Biológica, Instituto Oceanográfico, Universidade de São Paulo  
8 (USP). Praça do Oceanográfico, 191. CEP: 05508-900 São Paulo, SP, Brazil.

9 <sup>2</sup>Instituto de Biologia Roberto Alcantara Gomes, Universidade do Estado do Rio de Janeiro  
10 (UERJ). CEP: 20550-013, Rio de Janeiro, RJ, Brazil.

11 <sup>3</sup>Departamento de Oceanografia Física, Química e Geológica, Instituto Oceanográfico,  
12 Universidade de São Paulo (USP). Praça do Oceanográfico, 191. CEP: 05508-900 São Paulo, SP,  
13 Brazil.

14

15

16

17 \*Corresponding author:

18 Amanda Gonçalves Bendia, e-mail: [amandagb@usp.br](mailto:amandagb@usp.br)

19 Address: Departamento de Oceanografia Biológica, Instituto Oceanográfico, Universidade de São  
20 Paulo. Praça do Oceanográfico, 191. 05508-120 São Paulo, SP, Brazil.

21

22

23

24 **Abstract**

25

26 Microorganisms in Antarctica are recognized for having crucial roles in ecosystems functioning  
27 and biogeochemical cycles. In order to explore the diversity and composition of microbial  
28 communities through different terrestrial and marine Antarctic habitats, we analyze 16S rRNA  
29 sequence datasets from fumarole and marine sediments, soil, snow and seawater environments.  
30 We obtained measures of alpha- and beta-diversities, as well as we have identified the core  
31 microbiome and the indicator microbial taxa of a particular habitat. Our results showed a unique  
32 microbial community structure according to each habitat, including specific taxa composing each  
33 microbiome. Marine sediments harbored the highest microbial diversity among the analyzed  
34 habitats. In the fumarole sediments, the core microbiome was composed mainly by thermophiles  
35 and hyperthermophilic Archaea, while in the majority of soil samples Archaea was absent. In the  
36 seawater samples, the core microbiome was mainly composed by cultured and uncultured orders  
37 usually identified on Antarctic pelagic ecosystems. Snow samples exhibited common taxa in  
38 comparison to the habitats from the Antarctic Peninsula, which suggests long-distance dispersal  
39 processes occurring from the Peninsula to the Continent. This study contributes as a baseline for  
40 further efforts on evaluating the microbial responses to environmental conditions and future  
41 changes.

42

43 **Keywords:** microbial diversity, microbial indicators, core microbiome, Antarctic habitats

44

45

46

47

48

49

50

51

52

53

54

## 55           1. Introduction

56  
57 Despite extreme conditions, Antarctica harbors a complex mosaic of microbial habitats (Bowman,  
58 2018). In these habitats, microorganisms play a fundamental role in the food web and in the  
59 biogeochemical cycles. Recent studies revealed diverse bacterial and archaeal communities  
60 inhabiting terrestrial and marine habitats in Antarctica, showing to be distinct from Arctic and  
61 alpine communities (Boetius et al., 2015). Terrestrial habitats for free-living prokaryotes in  
62 Antarctica include especially mineral, ornithogenic and geothermal soils, permafrost, lakes,  
63 glaciers, snow and rocks. The microbial diversity in these habitats have been firstly described using  
64 culture-dependent methods (e.g. Friedmann et al., 1988; Hirsch et al., 1988; Siebert et al., 1996;  
65 Siebert and Hirsch, 1988), and most recently, through culture-independent strategies, mainly by  
66 16S rRNA sequencing (e.g. Alekseev et al., 2020; Almela et al., 2021; Archer et al., 2019; Bendia  
67 et al., 2018; Franco et al., 2017; Malard et al., 2019). These studies have shown phyla such as  
68 Proteobacteria, Actinobacteria, Acidobacteria, Bacteroidetes and Firmicutes as abundant in soils  
69 and permafrosts from Antarctic Peninsula (Bottos et al., 2014; Jansson and Taş, 2014), whereas  
70 Cyanobacteria, Flavobacteria and Alphaproteobacteria were the prevalent classes in snow  
71 samples from the Antarctic Plateau (Michaud et al., 2014).

72  
73 Marine habitats generally include deep and shallow sediments, and water column at both euphotic  
74 (<200 m) and aphotic zones (>200 m). Signori et al. (2014) studied microbial communities in  
75 water column at Bransfield Strait, Southern Ocean, and found Thaumarchaeota, Euryarchaeota and  
76 Proteobacteria (Gamma-, Delta-, Beta-, and Alphaproteobacteria) as abundant taxa below 100 m,  
77 whereas the dominant phyla above 100 m were Bacteroidetes and Proteobacteria (mainly Alpha-  
78 and Gammaproteobacteria). In marine sediments from Admiralty Bay (100–502 m total depth)  
79 (King George Island) and adjacent North Bransfield Basin (693–1147 m), Gammaproteobacteria  
80 was found as a highly abundant taxa (>90%), followed by Alpha- and Deltaproteobacteria,  
81 Firmicutes, Bacteroidetes and Actinobacteria (Franco et al., 2017).

82  
83 Although previous studies have described microbial communities in different environments from  
84 Maritime and Continental Antarctica (e.g. Alekseev et al., 2020; Almela et al., 2021; Archer et al.,  
85 2019; Bendia et al., 2018; Cavicchioli, 2015; Cowan et al., 2014; Franco et al., 2017; Malard et

86 al., 2019; Signori et al., 2014), few have focused on indicating the microbiome across a range of  
87 Antarctic habitats. In this study, we aimed to reveal the microbiome of five habitats (fumarole  
88 sediment, marine sediment, snow, soil and seawater) at two main Antarctic locations, including  
89 Antarctic Peninsula (King George Island and Deception Island) and Continental Antarctica (West  
90 Antarctica, 670 km from geographical South Pole, near Criosfera 1 module). We were able to  
91 describe the core microbiome and the microbial indicators of the different Antarctic habitats,  
92 contributing as a baseline study for further efforts on evaluating the microbial responses to  
93 environmental conditions and future changes.

94

95

## 96 **2. Methodology**

97

### 98 **2.1. Study area and sampling strategy**

99

100 All the samples selected for this study were collected during the Brazilian Antarctic expeditions  
101 (OPERANTAR) XXX to XXXV, comprising the years from 2012 to 2017, and were supported by  
102 the following projects: Microsfera (CNPq 407816/2013-5), INCT-Criosfera (CNPq 028306/2009  
103 - Criosfera 1 module) and MonitorAntar (USP-IO/MMA-SBF Agreement No. 009/2012). Detailed  
104 information is described in Supplementary Table 1.

105

106 The samples selected for this study comprise areas located in both Maritime and Continental  
107 Antarctica. In addition, samples include 5 different sample types, comprising the following  
108 habitats: marine sediment, fumarole sediment, snow, seawater and soil.

109

110 The sampling sites in Maritime Antarctica included King George Island (S 62° 23' S, W 58° 27')  
111 and Deception Island (S 62° 55', W 60° 37'), located in the South Shetland archipelago. Samples  
112 from King George Island included seawater, marine sediment and soil. Seawater samples were  
113 collected at Admiralty Bay near Wanda and Ecology Glaciers, using a Van-Dorn water-sampling  
114 bottle. Three water depths were collected and classified as superficial (0 - 5 m), intermediate (~10  
115 m) and bottom (~30 m) depths. Approximately 5 L of water of each sample were filtered on the  
116 Brazilian Antarctic Station “Comandante Ferraz” (EACF) using a vacuum pump and 0.22 µm-



117 membrane filters. Superficial marine sediments (0 - 5 cm) were collected on the east side of  
118 Admiralty Bay, near Point Hennequin, using a Van-Veen Grab Sampler. Approximately 200 g of  
119 sediments of each sample were placed into Whirl-Pak bags. Superficial soil samples (0 - 5 cm)  
120 were collected on the proximities of EACF and then placed into Whirl-Pak bags (~200 g). Samples  
121 from Deception Island comprised surface sediments (0 - 5 cm) in an intertidal region near active  
122 fumaroles, with temperatures of 110 °C for FBA1, FBA2 and FBA3, and 112 °C for FBB1, FBB2  
123 and FBB3. Fumarole sediments were placed into Whirl-Pak bags (~200 g).

124  
125 The Continental Antarctica sampling site is located at West Antarctica, 250 km from the southwest  
126 border of the Ronne ice shelf and 670 km from the geographic South Pole, where the Brazilian  
127 module Criosfera 1 is located (S 84°00', W 079°30'). Snow/firn samples were collected in an  
128 aseptic excavated pit structure near the Brazilian module. Six depths were collected between the  
129 surface and 200 cm, including 0 - 40 cm (C1), 40 - 85 cm (C2), 85 - 110 cm (C3), 110 - 160 cm  
130 (Crio4), 160 - 182 cm (Crio5), 182 - 200 cm (C6). Approximately 3 L of water of each sample  
131 were filtered in the Criosfera 1 module using a vacuum pump and 0.22 µm-membrane filters.

132  
133 All samples collected in this study were immediately frozen at -20°C for molecular analysis. The  
134 description of environmental samples, the coordinates and sampling year are detailed in  
135 Supplementary Table 1.

136

## 137 **2.2. DNA extraction and sequencing of the 16S rRNA gene**

138

139 The 0.22 µm-membrane filters of seawater and snow samples were submitted to DNA extraction  
140 using DNeasy PowerWater Kit (Qiagen, Hilden, Germany). For sediment and soil samples,  
141 approximately 500 mg were submitted to DNA extraction using DNeasy PowerSoil Kit (Qiagen,  
142 Hilden, Germany). Approximately 10 g of fumarole sediments were submitted to DNA extraction  
143 using DNeasy PowerMax Soil Kit (Qiagen, Hilden, Germany). All extractions were performed  
144 according to the manufacturer's instructions. Extracted DNA was quantified using Qubit dsDNA  
145 HS Assay (Thermo-Fisher Scientific, Waltham, U.S.A.) and Qubit Fluorometer 1.0 (Thermo-  
146 Fisher Scientific, Waltham, U.S.A.).

147

148 Total extracted DNA were sequenced using Illumina Miseq paired-end system 2 x 300 bp, with  
149 the primers 515F (5'-GTGYCAGCMGCCGCGGTAA-3') and 806R (5'-  
150 GGACTACNVGGGTWTCTAAT-3') (Caporaso et al., 2012) for fumarole sediment and snow  
151 samples, targeting the V4 region of the 16S rRNA gene, and the primers 515F (5'-  
152 GTGYCAGCMGCCGCGGTAA-3') and 926R (5'- CCGYCAATTYMTTTRAGTTT -3')  
153 (Quince et al., 2011) for seawater, soil and marine sediment samples, targeting the V4 and V5  
154 regions of the 16S rRNA gene. Details of pairs of primers used for each sample are in  
155 Supplementary Table 1. Library construction and sequencing were performed by MR DNA  
156 (Molecular Research LP, Shallowater, TX, EUA). The library sequencing followed the Earth  
157 Microbiome Project protocol (Thompson et al., 2017).

158

### 159 **2.3. Bioinformatics and statistical analyses**

160

161 Reads were initially imported into the Quantitative Insights Into Microbial Ecology 2 software  
162 (Qiime2) (v.2020.2, <https://docs.qiime2.org/>) (Bolyen et al., 2019) and then evaluated according  
163 to quality. To be consistent among the different sequence datasets and pairs of primers used in our  
164 study, only forward sequences (R1) were processed, comprising the V4 region of the 16S rRNA  
165 gene. Based on the quality scores, the forward reads were truncated at position 230, and trimmed  
166 at the position 25 to remove the primer, using the q2-dada2-denoise script. DADA2 software was  
167 used to obtain a set of observed amplicon sequence variants (ASVs) (Callahan et al., 2017).  
168 Taxonomic classification was performed through feature-classifier classify-sklearn using the Silva  
169 v.138 database (Quast et al., 2013; Yilmaz et al., 2014). The alignment was performed by MAFFT  
170 v.7 (Kato et al., 2002), using default parameters and the phylogenetic tree was built by FastTree  
171 (Price et al., 2009).

172

173 The Qiime2 output qza files were imported on R version 4.0.4 (R CORE TEAM) using the  
174 qiime2R package (<https://github.com/jbisanz/qiime2R>). Alpha and beta diversity metrics were  
175 computed through the phyloseq package (McMurdie and Holmes, 2012) on R at a rarefied  
176 sampling depth of 11,604 sequences. Statistical differences in alpha diversity indices were  
177 calculated by comparing sample types and location using the ANOVA test in stats package on R.  
178 Beta diversity was measured by weighted Unifrac distance and visualized via NMDS (non-metric

179 multidimensional scaling) using the phyloseq package in R (version 3.6.3). Differences in the  
180 microbial community structure among sample types and location were tested by performing a  
181 permutational multivariate analysis of variance (PERMANOVA) on the community matrix  
182 (Anderson, 2001).

183  
184 To observe the unique and shared ASVs by each sample type, the taxa abundance table was  
185 transformed to presence/absence. The number of shared ASVs by sample types was visualized  
186 using an UpSet plot, UpSetR package (Conway and Gehlenborg, 2019). The core microbiome of  
187 each sample type was considered as the shared ASVs within the sample type, which was visualized  
188 at order level through pie charts. The statistical package IndicSpecies (Cáceres et al., 2020) was  
189 used on R to identify microbial families whose abundance was significantly associated with a  
190 sample type.

191  
192 Sequencing data were deposited in the National Center for Biotechnology Information Sequence  
193 Read Archives (SRA) under BioProject IDs XXXXXX (IDs will be provided immediately after  
194 manuscript acceptance).

195

### 196 3. Results

197

#### 198 3.1. Richness and alpha diversity

199

200 We obtained 4,781,877 valid sequences distributed among 5 sample types (habitats), including 3  
201 samples of marine sediment, 6 samples of fumarole sediments, 6 samples of snow/firn, 52 samples  
202 of seawater and 27 samples of soil, totalizing 94 samples. A mean of 336 ASVs (SD  $\pm$  212) were  
203 detected for each sample. The values of ASVs, richness (Chao1) and alpha diversity (Shannon and  
204 InvSimpson) were statistically different ( $p < 0.05$ ) according to sample type, and not by location  
205 ( $p = 0.96$  for Chao1,  $p = 0.44$  for Simpson and  $p = 0.28$  for InvSimpson). Richness and alpha  
206 diversity results are represented in Figure 2 and detailed in Supplementary Table 1.

207

208 When grouped by location, the richness and alpha diversity values for the Antarctic continent  
209 samples were  $333.32 \pm 116.73$ [SD] (Chao1),  $3.60 \pm 0.63$  (Shannon) and  $10.30 \pm 3.78$  (InvSimpson);

210 346.84±84.92 (Chao1), 3.78±0.75 (Shannon) and 16.29±20.29 (InvSimpson) for Deception Island;  
211 323.72±213.57 (Chao1), 3.93±0.63 (Shannon) and 28.84±33.58 (InvSimpson) for King George  
212 Island.

213  
214 When grouped by sample types, marine sediment samples exhibited the highest values of richness  
215 (Chao1= 1095.24±276.30[SD]) and alpha diversity (Shannon= 6.01±0.23; InvSimpson=  
216 174.55±53.05), followed by soil samples (Chao1= 453.68±149.46; Shannon= 4.21±0.57;  
217 InvSimpson= 30.16±26.14). Fumarole sediments (Chao1= 349.38±84.70; Shannon= 3.79±0.74;  
218 InvSimpson= 16.46±20.48), snow (Chao1= 339.02±121.31; Shannon= 3.60±0.64; InvSimpson=  
219 10.32±3.87) and seawater (Chao1= 210.77±44.89; Shannon= 3.66±0.33; InvSimpson=  
220 19.83±5.18) exhibited the lowest values of richness and alpha diversity indices.

221

## 222 **3.2. Beta diversity**

223

224 Samples were clustered according to sample type and location through the weighted Unifrac  
225 distance analysis observed in NMDS (Figure 3). Seawater samples were grouped nearest from  
226 each other, as well as marine sediments. Samples of soil, fumarole sediment and snow exhibited a  
227 clustering pattern more distant from each other. Based on the PERMANOVA, samples were  
228 significantly influenced more by sample type ( $p<0.01$ ,  $R^2=0.61$ ) than by location ( $p<0.01$ ,  
229  $R^2=0.17$ ).

230

## 231 **3.3. Microbial community composition at phylum level**

232

233 A total of 29 phyla were classified as abundant ( $> 1\%$  of relative abundance) among our samples  
234 (Figure 4). The most abundant phyla in marine sediments were Proteobacteria (21.8±1.8%[SD]),  
235 Bacteroidota (19.9±5.0%), Acidobacteriota (14.0±2.9%), Verrucomicrobiota (11.8±2.4%),  
236 Actinobacteriota (9.3±1.1%), Chloroflexi (8.4±2.5%), Planctomycetota (4.1±1.4%),  
237 Gemmatimonadota (3.3±1.0%), Nitrospirota (2.2±0.8%) and Crenarchaeota (1.0±0.5%). In  
238 fumarole sediments, abundant phyla were classified as Aquificota (21.6±11.5%), Proteobacteria  
239 (21.1±13.6%), Crenarchaeota (13.6±9.5%), Firmicutes (11.3±8.2%), Deinococcota (6.0±5.9%),  
240 Actinobacteriota (3.8±1.4%), Patescibacteria (0.02±1.2%), Bacteroidota (1.7±1.0%), Chloroflexi

241 (1.6±1.8%), Verrucomicrobiota (1.5±0.5%) and Nanoarchaeota (1.1±0.7%). The most abundant  
242 phyla in snow samples were Proteobacteria (77.6±17.5%), followed by Actinobacteriota  
243 (9.0±14.6%), Firmicutes (7.5±3.9%) and Bacteroidota (1.5±0.8%). For water samples, only two  
244 phyla were abundant: Proteobacteria (62.8±5.8%) and Bacteroidota (35.4±5.8%). Abundant phyla  
245 in soil samples were Proteobacteria (63.2±0.9%), Bacteroidota (22.7±7.7%), Actinobacteriota  
246 (7.2±3.4%) and Acidobacteriota (3.0±3.6%).

247

### 248 **3.4. Shared ASVs and core microbiome**

249

250 The number of shared ASVs among sample types are represented in the upset plot of Figure 5. In  
251 general, communities from snow shared more ASVs with fumarole sediments (157 ASVs) and  
252 seawater (48 ASVs), whereas soil communities shared more ASVs with marine sediments (378  
253 ASVs) and seawater (115 ASVs). The pie charts (Figure 5) represent the taxonomic classification  
254 of ASVs (at order level) that were considered the core microbiome of each sample type. The core  
255 microbiome indicates the microbial taxa that are particularly widespread within a sample group.  
256 The results of core microbiome per sample type are detailed in Supplementary Table 2.

257

258 The core microbiome of marine sediments was composed mainly by the orders Chitinophagales  
259 (14.8%), Chthoniobacterales (12.5%), Burkholderiales (6.6%), Vicinamibacterales (3.7%),  
260 Chloroflexales (3.2%), Pyrinomonadales (3.0%), Gemmatimonadales (3.0%), among others. For  
261 fumarole sediments, the core microbiome was composed by orders such as Desulfurococcales  
262 (11.8%), Hydrogenothermales (9.6%), Unclassified\_Bacteria (5.4%), Rhodobacterales (4.3%),  
263 Woeseearchaeales (3.7%), Omnitrophales (3.5%), Nitrococcales (3.4%), among others. The core  
264 microbiome of snow samples included Pseudomonadales (29.5%), Burkholderiales (9.0%),  
265 Lactobacillales (6.4%), Alteromonadales (5.2%), Bacillales (4.2%), Chitinophagales (2.9%),  
266 among others. Seawater samples exhibited as the core microbiome the orders Flavobacteriales  
267 (40.7%), SAR11\_clade (10.6%), Cellvibrionales (9.9%), Rhodobacterales (8.1%),  
268 Oceanospirillales (4.3%), Burkholderiales (3.7%), Alteromonadales (2.7%), Marine\_Group\_II  
269 (1.2%), among others. The core microbiome of soil samples comprised the orders  
270 Xanthomonadales (14.4%), Sphingomonadales (13.8%), Flavobacteriales (12.0%),  
271 Chitinophagales (11.8%), Burkholderiales (9.4%), Vicinamibacterales (3.5%), among others.

272 Finally, the core microbiome when considered all samples was composed by two orders:  
273 Xanthomonadales (35.1%) and Alteromonadales (64.8%).

274

### 275 **3.5. Microbial indicators for each sample type**

276

277 By using the R package IndicSpecies we were able to identify the families significantly associated  
278 with each sample type, which are represented in Figure 6 and detailed in Supplementary Table 3.  
279 Marine sediments was the sample type which exhibited the highest number of indicators, totalizing  
280 81 families classified within 22 phyla, such as Anaerolineaceae (Chloroflexi), Pyrinomonadaceae  
281 (Acidobacteriota), Holosporaceae (Proteobacteria) and Gaiellaceae (Actinobacteria). A total of 12  
282 families were indicators for fumarole sediments: lineage\_IV within Elusimicrobiota,  
283 Pyrodictiaceae, Hydrogenothermaceae, Candidatus\_Zambryskibacteria, Desulfurococcaceae,  
284 Candidatus\_Nomurabacteria, Acidilobaceae, SAR202\_clade, Methylomirabilaceae, Thermaceae,  
285 Thermicanaceae and Woeseearchaeales. For snow samples, 4 families were considered as  
286 indicators, classified as Oleiphilaceae (Proteobacteria), Burkholderiaceae (Proteobacteria),  
287 Bifidobacteriaceae (Actinobacteriota) and Exiguobacteraceae (Firmicutes). Eleven families were  
288 indicators of seawater samples, which were classified as Parvibaculaceae, OCS116\_clade,  
289 Cryomorphaceae, OM182\_clade, NS7\_marine\_group, Clade\_III (SAR11\_clade),  
290 Marine\_Group\_II, Psychromonadaceae, Arcobacteraceae, SAR116\_clade and uncultured family.  
291 Finally, 4 families were indicators of soil samples, which belonged to NRL2 (Proteobacteria),  
292 Demequinaceae (Actinobacteriota), Iamiaceae (Actinobacteriota) and Immundisolibacteraceae  
293 (Proteobacteria).

294

295

## 296 **4. Discussion**

297

298 In our study, we were able to describe the core microbiome and the microbial indicators of five  
299 Antarctic habitats located at both Maritime and Continental Antarctica. Our results showed that  
300 marine sediment was the habitat which harbored the highest microbial diversity. We observed a  
301 significant difference of microbial community structure according to each habitat, showing that

302 despite geographical distances, the environmental conditions act as strong pressures for selecting  
303 specific microbial taxa.

304

#### 305 **4.1. Microbiome of marine sediments from King George Island**

306 Globally, marine sediments cover 70% of Earth's surface and are thought to be a larger biomass  
307 reservoir than seawater, counting for 0.18 to 3.6% of the total living biomass of the Earth  
308 (Kallmeyer et al., 2012; Parkes et al., 2014). In Antarctica, the estimation of the microbial biomass  
309 in marine sediments is still poorly understood. The microbial abundance in marine sediments is  
310 frequently associated with depth patterns, generally decreasing with increasing depth. A recent  
311 study estimated a bacterial and archaeal richness in marine sediment between  $4.03 \times 10^4$  to  $3.30 \times$   
312  $10^6$  ASVs (Hoshino et al., 2020). These values were comparable to the richness estimated for  
313 topsoil and seawater samples, which comprised  $7.88 \times 10^4$  to  $1.69 \times 10^7$ , and  $3.00 \times 10^4$  to  $1.69 \times$   
314  $10^6$ , respectively (Hoshino et al. 2020). In the present study, marine sediments showed the highest  
315 microbial richness ( $1.09 \times 10^3$  ASVs) when compared to the other habitats, but exhibited lower  
316 values than those estimated by Hoshino et al. (2020). It is plausible to observe these contrasts  
317 between the global estimations for marine sediments and our richness results, since benthic  
318 communities in Antarctica have to adapt to the environmental extreme conditions, such as the  
319 prevalent low temperatures, freeze and thaw cycles, low nutrient input, and high salinity (Bölter  
320 et al., 2002; Convey et al., 2009). These conditions produce narrow microbial niches and demand  
321 specific adaptive mechanisms for microbial growth and survival (Cowan et al., 2014).

322

323 Also, this pattern probably reflects the more stable temperatures in the sediments (when compared  
324 to other Antarctic habitats), where communities should fluctuate little seasonally, and then more  
325 microbial taxa could be able to survive. Other possibilities to explain the highest diversity in  
326 marine sediments could be due to the contribution of the communities from soil and snow, which  
327 reach inlet waters as results of glacier defrost, or due to cell deposition by descendant of pelagic  
328 communities, which could be buried and preserved for long periods (Hoshino et al., 2020).

329 The core microbiome of marine sediments from Admiralty Bay (King George Island) had the  
330 prevalence of Bacteroidota, Verrucomicrobiota, Acidobacteria, Chloroflexi, Gemmatimonadota  
331 and Proteobacteria, in which some members of these phyla have been previously described in  
332 marine sediments of the Antarctic Peninsula (Foong et al., 2010; Li et al., 2020; Powell et al.,



333 2003). Franco et al. (2017) revealed a high prevalence of heterotrophic gammaproteobacterial  
334 phylotypes in the marine sediments of Admiralty Bay, but also reported the presence of taxa from  
335 Bacteroidota, Verrucomicrobiota, Acidobacteria, Chloroflexi, Gemmatimonadota phyla.

336 Among the microbial families observed as indicators of marine sediments, Anaerolineaceae  
337 (Chroloflexi) have been previously described as abundant in marine sediments, being involved  
338 with hydrocarbon degradation (Fincker et al., 2020). In addition, we also observed  
339 Pyrinomonadaceae as an indicator of marine sediments, which members were previously observed  
340 in diesel contaminated soil samples from King George Island (Gran-Scheuch et al., 2020), and also  
341 in other extreme environments, such as semi-arid savannah and volcanic soils (Pascual et al.,  
342 2018). This bacterial family comprises aerobic and chemoheterotrophic mesophiles or  
343 thermophiles, capable of growing in mildly acidophilic environments (Dedysh and Damsté, 2018).

344

#### 345 **4.2. Microbiome of fumarole sediments from Deception Island**

346 Previous studies have indicated that temperature is one of the major drivers of microbial  
347 communities' diversity and structure (e.g. Price and Giovannelli, 2017; Sharp et al., 2014).  
348 Geothermal and hydrothermal ecosystems have been considered as “open-air” laboratories for  
349 revealing the responses of microbial communities to temperature gradients (e.g. Antranikian et al.,  
350 2017; Bendia et al., 2018; Ward et al., 2017). One of the most interesting ecosystems to explore  
351 temperature-adapted extremophiles (psychrophiles, thermophiles, and hyperthermophiles) are the  
352 polar volcanoes, where we can find extreme temperature and geochemical gradients over very  
353 short distances (Herbold et al., 2014). In Antarctica, a recent study showed that Deception Island  
354 volcano harbor different extremophilic lineages, which were strongly driven by steep temperature  
355 gradients (from 0 to 98 °C) (Bendia et al., 2018).

356

357 In our study, the fumarole sediments from Fumarole Bay on Deception Island, which comprised  
358 the temperatures of 110 °C and 112 °C, exhibited as the core microbiome mostly bacterial and  
359 archaeal lineages related to thermophiles and hyperthermophiles, such as those within the orders  
360 Hydrogenothermales, Sulfobacilalles, Desulfurococcales and Thermales. Further, the indicator  
361 families of fumarole sediments belong to thermophiles and hyperthermophiles (Pyrodictiaceae and  
362 Hydrogenothermaceae), and to spore-forming bacteria from Firmicutes phylum  
363 (Carnobacteriaceae). Pyrodictiaceae comprises members which are autotrophic anaerobes,



364 hydrogen-oxidizers, denitrifiers and iron-reducers, whereas Hydrogenothermaceae are usually  
365 aerobes or anaerobes, autotrophs, sulfur-oxidizers and denitrifiers (Zeng et al., 2021). Our results  
366 indicate that, despite the geographic isolation and the predominantly cold habitats in Antarctica,  
367 the hyperthermophilic temperatures act as strong pressures on selecting hyperthermophilic  
368 lineages, which showed to be widespread across these fumaroles, as also observed by Bendia et  
369 al. (2018). By comparing Deception communities with continental geothermal systems in  
370 Antarctica, such as Tramway Ridge in Mount Erebus (Herbold et al., 2014; Soo et al., 2009), few  
371 taxa are shared, mainly related to Chloroflexi and Planctomycetes. Pyrodictiaceae and  
372 Hydrogenothermaceae lineages were found in geothermal systems, and in shallow and deep-sea  
373 hydrothermal vents, such as those in Mariana Volcanic Arc (Nakagawa et al., 2006), Manus Basin,  
374 New Guinea (Takai et al., 2001), Vulcano, Italy (Stetter et al., 1983), Tachibana Bay, Japan (Takai  
375 and Sako, 1999), and near Tonga subduction zone in the Southwestern Pacific (Ferrera et al.,  
376 2014).

377

### 378 **4.3. Microbiome of snow from West Continental Antarctica**

379 The continental snow represents a dynamic habitat where microorganisms encounter low  
380 temperatures, variability in surface UV radiation and limited water and nutrients availability  
381 (Larose et al., 2013). Previous studies, including from non-polar environments, identified  
382 Proteobacteria, Bacteroidetes, Firmicutes and Cyanobacteria as the dominant taxa in snow habitats  
383 in Antarctica (Antony et al., 2016; Lopatina et al., 2016; Malard et al., 2019; Michaud et al., 2014;  
384 Yan et al., 2012), Arctic (Harding et al., 2011; Hell et al., 2013; Larose et al., 2013; Maccario et  
385 al., 2014), Austria (Battin et al., 2001), Canada (Boyd et al., 2011) and Svalbard (Zarsky et al.,  
386 2013). Although previous studies investigated Antarctic snow, few have focused on microbial  
387 diversity and distribution, with these studies limited to specific locations leaving the vast majority  
388 of the continent unexplored (Boetius et al., 2015; Hodson et al., 2017; Luo et al., 2020).

389 In the present study, the snow from West Antarctica (near Brazilian module Criosfera1) exhibited  
390 as the core microbiome bacterial lineages related to Proteobacteria, especially Alphaproteobacteria  
391 and Gammaproteobacteria, and also several orders related to heterotrophs, such as  
392 Alteromonadales, Bacillales, Burkholderiales and Chitinophagales, which is in accordance with  
393 previous studies on the Antarctic snow microbial community (Michaud et al., 2014; Antony et al.,  
394 2016; Lopatina et al., 2016). We detected one archaeal taxa as the core microbiome in snow

395 samples, assigned within the order Nitrosopumilales (Crenarchaeota), while a previous study  
396 (Antony et al., 2016) identified only Halobacteriaceae (Euryarchaeota) in snow samples from East  
397 Antarctica. The detection of Nitrosopumilales across a variety of temperature and saline gradients,  
398 suggests that its members have the ability to adapt to hot and cold habitats, as well as to terrestrial  
399 and marine ecosystems (Bendia et al., 2018; Learman et al., 2016; Lezcana et al., 2019; Pessi et  
400 al., 2015). The family indicators for snow samples were Oleiphilaceae, Burkholderiaceae,  
401 Bifidobacteriaceae and Exiguobacteraceae, whose members are often aerobes and heterotrophs  
402 (Biavati and Mattarelli, 2018; Coenye, 2014; Vishnivetskaya et al., 2009; Yakimov and Golyshin,  
403 2014), and commonly present in soil habitats from Antarctica (Buelow et al., 2016; Chaturvedi et  
404 al., 2008; Pearce et al., 2012), except for Oleiphilaceae, which were predominantly found in deep  
405 marine sediments and are known to be hydrocarbon degraders (Bacosa et al., 2018; Golyshin et  
406 al., 2002).

407 It is still not clear if the presence of these bacteria and archaea in snow habitats reflects their ability  
408 to adapt and survive in extreme conditions (Edwards et al., 2014), or whether their high  
409 predominance in other Antarctic ecosystems favors their aeolian dispersion and preservation along  
410 surface habitats in the cryosphere (Archer et al., 2019). Previous studies suggested that soil  
411 microorganisms are the primary sources of snow microbial communities of the West Greenland  
412 Ice Sheet (Cameron et al., 2015) and Arctic (Cuthbertson et al., 2017; Šantl-Temkiv et al., 2018).  
413 Previous studies indicated the dominance of Proteobacteria and Firmicutes in airborne microbial  
414 communities in Antarctica (Bottos et al., 2014; Pearce et al., 2010), and the study by Malard et al.,  
415 (2019) identified similarities between snow and airborne microbial communities in continental  
416 Antarctica, which suggests the importance of long-distance dispersal in seeding continental  
417 Antarctic snow ecosystems.

418

#### 419 **4.4. Microbiome of soils from King George Island**

420 Although the ice-free areas comprise less than 0.3% of the total Antarctic area, soils are the most  
421 studied microbial habitat in Antarctica (Cowan et al., 2014). Soil habitats represent a wide variety  
422 of landforms and geochemistry, in which Proteobacteria and Actinobacteria showed to be  
423 dominant (Babalola et al., 2009; Makhalyane et al., 2013). Archaeal taxa in Antarctic soils  
424 showed to be a negligible portion of the total microbial community and have likely a minimal role  
425 in soil processes (Cowan et al., 2014). A similar pattern was observed among our soil samples

426 from King George Island, where Acidobacteriota, Actinobacteriota, Bacteroidota and  
427 Proteobacteria were the most abundant phyla, while several heterotrophic bacterial families, such  
428 as Pseudomonadales, Flavobacteriales, Cytophagales, Chitinophagales, comprised the core  
429 microbiome. Wang et al. (2015) also found the predominance of Proteobacteria, Actinobacteria,  
430 Acidobacteria, and Verrucomicrobia in four soil types at Fildes Region, King George Island,  
431 including pristine and human-impacted soils. Flavobacteriales members are widespread in  
432 terrestrial and marine Antarctic ecosystems, and the genus *Flavobacterium* have shown to play an  
433 important role in remineralization processes mainly due to its strong macromolecular hydrolytic  
434 capabilities (McCammon and Bowman, 2000). In contrast to our results, Ramos et al. (2019)  
435 showed a dominance of Firmicutes in soils from eleven regions of Admiralty Bay, King George  
436 Island. Differences in microbial composition of ecologically comparable soils from King George  
437 Island suggest a high level of spatial heterogeneity in prokaryotic diversity, as previously indicated  
438 by (Almela et al., 2021).

439  
440 The indicator taxa of soil samples comprised four families, classified as Iamiaceae and  
441 Demequinaceae, both belonging to Actinobacteriota phylum and with members isolated from  
442 marine environments (Kurahashi et al., 2011; Ue et al., 2011), and NRL2 and  
443 Immundisolibacteraceae, which have lineages capable of hydrocarbon degradation (Corteselli et  
444 al., 2017). Since our soil samples were collected near Comandante Ferraz Brazilian Antarctic  
445 Station, the presence of hydrocarbon degraders might indicate an anthropogenic influence on  
446 microbial communities of the surrounding soil. Further, the presence of marine bacteria in soils  
447 from King George Island indicates that the ocean might be an important source of biological input  
448 to terrestrial environments, as suggested by Chong et al. (2012).

449  
450

#### 451 **4.4. Microbiome of seawater from King George Island**

452 Microbial communities along seawater samples from Admiralty Bay were very similar, even when  
453 comparing the superficial, intermediate and bottom depths. We observed as the core microbiome  
454 several marine orders, such as Alteromonadales, Oceanospirillales, SAR11 clade,  
455 Flavobacteriales, Rhodobacterales and the archaeal Marine Group II. These groups also showed  
456 to be abundant in shallow waters of the Bransfield Strait (Signori et al., 2018, 2014).

457 Alteromonadales and Oceanospirillales are known to play an important role in organic carbon  
458 degradation by the production of extracellular hydrolytic enzymes (Dang et al., 2009). Some  
459 members of Oceanospirillales are also potential chemoautotrophs due to the presence of carbon  
460 fixation genes (Calvin Cycle pathway) (DeLorenzo et al., 2012). Although several members of the  
461 seawater community from Admiralty Bay were very similar to those found in surface waters of  
462 Bransfield Strait (Signori et al., 2018), we did not detect some key taxa, such as those within  
463 ammonia-oxidizing Archaea (Thaumarchaeota). Thaumarchaeota lineages were indeed detected  
464 in high abundance at surface colder waters of the Southern Ocean (~ -1 °C) (Signori et al., 2018),  
465 which might explain why they were not found in the warmer waters from Admiralty Bay. Further,  
466 the high number of Rhodobacterales members in our seawater samples might be explained because  
467 they are primary colonizers of particulate organic matter (Dang et al., 2009), which become more  
468 available by the processes of glaciers melting during summer.

469  
470 Among the 11 families assigned as indicators of seawater samples, the majority include  
471 uncultivated marine lineages, such as OM182 clade, OCS1116 clade and NS7 marine group,  
472 whose metabolic capabilities and roles in biogeochemical cycles are still unknown. The archaeal  
473 Marine Group II was also assigned as an indicator of seawater and comprises uncultivated lineages  
474 generally more common in surface waters that are potentially phototrophs due to the presence of  
475 proteorhodopsin genes (Pereira et al., 2019). Further, several members of the seawater microbiome  
476 have shown to contribute to important ecological processes in oligotrophic and cold waters, such  
477 as to biomass accumulation and to remineralization of organic matter, so that any environmental  
478 changes could strongly affect their functioning in biogeochemical cycles (Tonelli et al., 2021),  
479 with possible cascading effects on higher trophic levels (Signori et al., 2018).

480

481

## 482 **5. Conclusion**

483

484 In conclusion, our study showed that in Antarctica, the microbiome of each terrestrial and marine  
485 habitats here analysed, harbors specific bacterial and archaeal taxa. In fumarole sediments, we  
486 found the higher proportion of archaeal taxa, which were mostly related to hyperthermophiles,  
487 while in soil samples archaeal lineages were very low abundant or absent. Marine sediments

488 showed the highest microbial diversity and then more taxa indicators when compared to the other  
489 habitats. Surprisingly, although geographically distant, the continental snow samples exhibited  
490 common taxa in comparison to the habitats from the Antarctic Peninsula, which suggests long-  
491 distance dispersal processes occurring from the Peninsula to the Continent. Seawater communities  
492 showed to harbor similar taxa from those previously described for Bransfield Strait, with the  
493 absence of some taxa, such as ammonia-oxidizing Thaumarchaeota members. The description and  
494 proposal of key taxa from different Antarctic microbiomes are important for further studies aiming  
495 to elucidate which environmental factors drive those microbial communities, as well as to give  
496 insights about the interplay of microbial assemblages among the Antarctic ecosystems.

497

498

#### 499 **Acknowledgements**

500 We thank the captain and the crew of the research polar vessel Almirante Maximiano, and the  
501 chief and team of the Comandante Ferraz Brazilian Antarctic Station for their support in sampling  
502 during the OPERANTARs XXX to XXXV. We thank the Criosfera 1 team, in special Dr.  
503 Emanuele Kuhn, for their support in sampling during OPERANTAR XXXII. We are very thankful  
504 to LECOM's research team, and Rosa C. Gamba for their scientific support.

505

506

#### 507 **Funding**

508 This study was part of the projects Microsfera (CNPq 407816/2013-5), INCT-Criosfera (CNPq  
509 028306/2009 - Criosfera 1 module) and MonitorAntar (USP-IO/MMA-SBF Agreement No.  
510 009/2012), supported by the Brazilian National Council of Technological and Scientific  
511 Development (CNPq), Brazilian Ministry of the Environment (MMA) and the Brazilian Antarctic  
512 Program (ProAntar). The São Paulo Research Foundation – FAPESP supported the AB  
513 Doctorate's fellowship (2012/23241-0).

514

#### 515 **Conflict of Interest Statement**

516 The authors declare that the research was conducted in the absence of any commercial or financial  
517 relationships that could be construed as a potential conflict of interest.

## 518 **Figure Legends**

519

520 Figure 1. Study locations and sampling sites in the northwest region of Antarctica. The subfigures  
521 a, b, c and d represent, respectively, the South Shetland Islands region, the southwest border of the  
522 Ronne Ice Shelf, the Admiralty Bay in King George Island and the Deception Island. The red  
523 diamonds on the left side represent the three distinct study areas, and the circle represents the  
524 sample types by colors (yellow = fumarole sediment, pink = marine sediment, dark blue =  
525 seawater, light blue = snow, brown = soil). The map was made by using the Qgis software  
526 (QGIS.org 2021) and the Quantarctica data set (Matsuoka et al. 2018).

527

528 Figure 2. Alpha diversity analyses, including the number of ASVs (observed), the richness index  
529 of Chao1, and the alpha diversity indices of Shannon and InviSimpson. Samples are grouped by  
530 each habitat (sample type).

531

532 Figure 3. Non-metric multidimensional scaling (nMDS) ordination based on weighted UNIFRAC  
533 distances. The shapes represent the three main regions in Antarctica and colors the Antarctic  
534 habitats (sample types). Stress value=0.118.

535

536 Figure 4. Microbial community composition grouped by each Antarctic habitat (sample type). The  
537 figure shows the relative abundance of bacterial and archaeal taxonomic groups at phylum level.  
538 Only phylum with more than 0.1% of abundance are represented. Sequences were taxonomically  
539 classified using the Silva database v. 138.

540

541 Figure 5. Upset plot composed by ASVs identified among sample types. Circles indicate sample  
542 types. Black lines connecting circles indicate shared ASVs. Vertical bars indicate intersection size  
543 (number of ASVs) on each set. Pie charts show microbial composition specific to each sample  
544 type (orders with abundance > 1%) and those shared among all sample types or habitats (core  
545 microbiome).

546

547 Figure 6. Indicator families identified as significantly associated with each sample type (habitat),  
548 calculated using the R package IndicSpecies. The colors represent the phyla classifications of each  
549 family.

550

## 551 **Supplementary Table Legends**

552

553 Supplementary Table 1. Detailed description of environmental samples, including Sample IDs,  
554 location, coordinates, sample types, depth, sampling year, name of the project, DNA extraction  
555 method, pairs of primers, and diversity indices assigned for each sample.

556

557 Supplementary Table 2. Results from core microbiome analysis, at order level, represented as  
558 percentages (%) by each sample type (habitat).

559

560 Supplementary Table 3. Results from IndicSpecies analysis, at family level, including the  
561 number of p values for each taxa and grouped by sample type (habitat).

562

563

564

## 565 **References**

566 Alekseev, I., Zverev, A., Abakumov, E., 2020. Microbial Communities in Permafrost Soils of  
567 Larsemann Hills, Eastern Antarctica: Environmental Controls and Effect of Human  
568 Impact. *Microorganisms* 8, 1202. <https://doi.org/10.3390/microorganisms8081202>

569 Almela, P., Justel, A., Quesada, A., 2021. Heterogeneity of Microbial Communities in Soils From  
570 the Antarctic Peninsula Region. *Front. Microbiol.* 12.  
571 <https://doi.org/10.3389/fmicb.2021.628792>

572 Anderson, M.J., 2001. Permutation tests for univariate or multivariate analysis of variance and  
573 regression. *Can. J. Fish. Aquat. Sci.* <https://doi.org/10.1139/f01-004>

574 Antony, R., Sanyal, A., Kapse, N., Dhakephalkar, P.K., Thamban, M., Nair, S., 2016. Microbial  
575 communities associated with Antarctic snow pack and their biogeochemical implications.  
576 *Microbiol. Res.* 192, 192–202. <https://doi.org/10.1016/j.micres.2016.07.004>

577 Antranikian, G., Suleiman, M., Schäfers, C., Adams, M.W.W., Bartolucci, S., Blamey, J.M.,  
578 Birkeland, N.-K., Bonch-Osmolovskaya, E., da Costa, M.S., Cowan, D., Danson, M.,  
579 Forterre, P., Kelly, R., Ishino, Y., Littlechild, J., Moracci, M., Noll, K., Oshima, T., Robb,



- 580 F., Rossi, M., Santos, H., Schönheit, P., Sterner, R., Thauer, R., Thomm, M., Wiegel, J.,  
581 Stetter, K.O., 2017. Diversity of bacteria and archaea from two shallow marine  
582 hydrothermal vents from Vulcano Island. *Extrem. Life Extreme Cond.* 21, 733–742.  
583 <https://doi.org/10.1007/s00792-017-0938-y>
- 584 Archer, S.D.J., Lee, K.C., Caruso, T., Maki, T., Lee, C.K., Cary, S.C., Cowan, D.A., Maestre, F.T.,  
585 Pointing, S.B., 2019. Airborne microbial transport limitation to isolated Antarctic soil  
586 habitats. *Nat. Microbiol.* 4, 925–932. <https://doi.org/10.1038/s41564-019-0370-4>
- 587 Babalola, O.O., Kirby, B.M., Le Roes-Hill, M., Cook, A.E., Cary, S.C., Burton, S.G., Cowan,  
588 D.A., 2009. Phylogenetic analysis of actinobacterial populations associated with Antarctic  
589 Dry Valley mineral soils. *Environ. Microbiol.* 11, 566–576. <https://doi.org/10.1111/j.1462-2920.2008.01809.x>
- 591 Bacosa, H.P., Erdner, D.L., Rosenheim, B.E., Shetty, P., Seitz, K.W., Baker, B.J., Liu, Z., 2018.  
592 Hydrocarbon degradation and response of seafloor sediment bacterial community in the  
593 northern Gulf of Mexico to light Louisiana sweet crude oil. *ISME J.* 12, 2532–2543.  
594 <https://doi.org/10.1038/s41396-018-0190-1>
- 595 Battin, T.J., Wille, A., Sattler, B., Psenner, R., 2001. Phylogenetic and Functional Heterogeneity  
596 of Sediment Biofilms along Environmental Gradients in a Glacial Stream. *Appl. Environ.  
597 Microbiol.* 67, 799–807. <https://doi.org/10.1128/AEM.67.2.799-807.2001>
- 598 Bendia, A.G., Signori, C.N., Franco, D.C., Duarte, R.T.D., Bohannan, B.J.M., Pellizari, V.H.,  
599 2018. A Mosaic of Geothermal and Marine Features Shapes Microbial Community  
600 Structure on Deception Island Volcano, Antarctica. *Front. Microbiol.* 9.  
601 <https://doi.org/10.3389/fmicb.2018.00899>
- 602 Biavati, B., Mattarelli, P., 2018. Chapter 3 - Related Genera Within the Family Bifidobacteriaceae,  
603 in: Mattarelli, P., Biavati, B., Holzapfel, W.H., Wood, B.J.B. (Eds.), *The Bifidobacteria  
604 and Related Organisms*. Academic Press, pp. 49–66. <https://doi.org/10.1016/B978-0-12-805060-6.00003-X>
- 606 Boetius, A., Anesio, A.M., Deming, J.W., Mikucki, J.A., Rapp, J.Z., 2015. Microbial ecology of  
607 the cryosphere: sea ice and glacial habitats. *Nat. Rev. Microbiol.* 13, 677–690.  
608 <https://doi.org/10.1038/nrmicro3522>
- 609 Bölter, M., Beyer, L., Stonehouse, B., 2002. Antarctic Coastal Landscapes: Characteristics,  
610 Ecology and Research, in: Beyer, Lothar, Bölter, Manfred (Eds.), *Geocology of Antarctic  
611 Ice-Free Coastal Landscapes, Ecological Studies*. Springer, Berlin, Heidelberg, pp. 5–15.  
612 [https://doi.org/10.1007/978-3-642-56318-8\\_1](https://doi.org/10.1007/978-3-642-56318-8_1)
- 613 Bolyen, E., Rideout, J.R., Dillon, M.R., Bokulich, N.A., Abnet, C.C., Al-Ghalith, G.A., Alexander,  
614 H., Alm, E.J., Arumugam, M., Asnicar, F., Bai, Y., Bisanz, J.E., Bittinger, K., Brejnrod,  
615 A., Brislawn, C.J., Brown, C.T., Callahan, B.J., Caraballo-Rodríguez, A.M., Chase, J.,  
616 Cope, E.K., Da Silva, R., Diener, C., Dorrestein, P.C., Douglas, G.M., Durall, D.M.,  
617 Duvallet, C., Edwardson, C.F., Ernst, M., Estaki, M., Fouquier, J., Gauglitz, J.M., Gibbons,  
618 S.M., Gibson, D.L., Gonzalez, A., Gorlick, K., Guo, J., Hillmann, B., Holmes, S., Holste,  
619 H., Huttenhower, C., Huttley, G.A., Janssen, S., Jarmusch, A.K., Jiang, L., Kaehler, B.D.,



- 620 Kang, K.B., Keefe, C.R., Keim, P., Kelley, S.T., Knights, D., Koester, I., Kosciulek, T.,  
621 Kreps, J., Langille, M.G.I., Lee, J., Ley, R., Liu, Y.-X., Loftfield, E., Lozupone, C., Maher,  
622 M., Marotz, C., Martin, B.D., McDonald, D., McIver, L.J., Melnik, A.V., Metcalf, J.L.,  
623 Morgan, S.C., Morton, J.T., Naimey, A.T., Navas-Molina, J.A., Nothias, L.F., Orchanian,  
624 S.B., Pearson, T., Peoples, S.L., Petras, D., Preuss, M.L., Pruesse, E., Rasmussen, L.B.,  
625 Rivers, A., Robeson, M.S., Rosenthal, P., Segata, N., Shaffer, M., Shiffer, A., Sinha, R.,  
626 Song, S.J., Spear, J.R., Swafford, A.D., Thompson, L.R., Torres, P.J., Trinh, P., Tripathi,  
627 A., Turnbaugh, P.J., Ul-Hasan, S., van der Hooft, J.J.J., Vargas, F., Vázquez-Baeza, Y.,  
628 Vogtmann, E., von Hippel, M., Walters, W., Wan, Y., Wang, M., Warren, J., Weber, K.C.,  
629 Williamson, C.H.D., Willis, A.D., Xu, Z.Z., Zaneveld, J.R., Zhang, Y., Zhu, Q., Knight,  
630 R., Caporaso, J.G., 2019. Reproducible, interactive, scalable and extensible microbiome  
631 data science using QIIME 2. *Nat. Biotechnol.* 37, 852–857.  
632 <https://doi.org/10.1038/s41587-019-0209-9>
- 633 Bottos, E.M., Scarrow, J.W., Archer, S.D.J., McDonald, I.R., Cary, S.C., 2014. Bacterial  
634 Community Structures of Antarctic Soils, in: Cowan, D.A. (Ed.), *Antarctic Terrestrial*  
635 *Microbiology: Physical and Biological Properties of Antarctic Soils*. Springer, Berlin,  
636 Heidelberg, pp. 9–33. [https://doi.org/10.1007/978-3-642-45213-0\\_2](https://doi.org/10.1007/978-3-642-45213-0_2)
- 637 Bowman, J.S., 2018. Identification of Microbial Dark Matter in Antarctic Environments. *Front.*  
638 *Microbiol.* 9. <https://doi.org/10.3389/fmicb.2018.03165>
- 639 Boyd, E.S., Lange, R.K., Mitchell, A.C., Havig, J.R., Hamilton, T.L., Lafrenière, M.J., Shock,  
640 E.L., Peters, J.W., Skidmore, M., 2011. Diversity, Abundance, and Potential Activity of  
641 Nitrifying and Nitrate-Reducing Microbial Assemblages in a Subglacial Ecosystem. *Appl.*  
642 *Environ. Microbiol.* 77, 4778–4787. <https://doi.org/10.1128/AEM.00376-11>
- 643 Buelow, H.N., Winter, A.S., Van Horn, D.J., Barrett, J.E., Gooseff, M.N., Schwartz, E., Takacs-  
644 Vesbach, C.D., 2016. Microbial Community Responses to Increased Water and Organic  
645 Matter in the Arid Soils of the McMurdo Dry Valleys, Antarctica. *Front. Microbiol.* 7.  
646 <https://doi.org/10.3389/fmicb.2016.01040>
- 647 Cáceres, M.D., Jansen, F., Dell, N., 2020. *indicspecies*: Relationship Between Species and Groups  
648 of Sites.
- 649 Callahan, B.J., McMurdie, P.J., Holmes, S.P., 2017. Exact sequence variants should replace  
650 operational taxonomic units in marker-gene data analysis. *ISME J.* 11, 2639–2643.  
651 <https://doi.org/10.1038/ismej.2017.119>
- 652 Cameron, K.A., Hagedorn, B., Diesler, M., Christner, B.C., Choquette, K., Sletten, R., Crump, B.,  
653 Kellogg, C., Junge, K., 2015. Diversity and potential sources of microbiota associated with  
654 snow on western portions of the Greenland Ice Sheet. *Environ. Microbiol.* 17, 594–609.  
655 <https://doi.org/10.1111/1462-2920.12446>
- 656 Caporaso, J.G., Lauber, C.L., Walters, W.A., Berg-Lyons, D., Huntley, J., Fierer, N., Owens, S.M.,  
657 Betley, J., Fraser, L., Bauer, M., Gormley, N., Gilbert, J.A., Smith, G., Knight, R., 2012.  
658 Ultra-high-throughput microbial community analysis on the Illumina HiSeq and MiSeq  
659 platforms. *ISME J.* 6, 1621–1624. <https://doi.org/10.1038/ismej.2012.8>

- 660 Cavicchioli, R., 2015. Microbial ecology of Antarctic aquatic systems. *Nat. Rev. Microbiol.* 13,  
661 691–706. <https://doi.org/10.1038/nrmicro3549>
- 662 Chaturvedi, P., Prabahar, V., Manorama, R., Pindi, P.K., Bhadra, B., Begum, Z., Shivaji, S.Y.  
663 2008, n.d. *Exiguobacterium soli* sp. nov., a psychrophilic bacterium from the McMurdo  
664 Dry Valleys, Antarctica. *Int. J. Syst. Evol. Microbiol.* 58, 2447–2453.  
665 <https://doi.org/10.1099/ijs.0.2008/000067-0>
- 666 Chong, C.W., Pearce, D.A., Convey, P., Yew, W.C., Tan, I.K.P., 2012. Patterns in the distribution  
667 of soil bacterial 16S rRNA gene sequences from different regions of Antarctica. *Geoderma*  
668 181–182, 45–55. <https://doi.org/10.1016/j.geoderma.2012.02.017>
- 669 Coenye, T., 2014. The Family Burkholderiaceae, in: Rosenberg, E., DeLong, E.F., Lory, S.,  
670 Stackebrandt, E., Thompson, F. (Eds.), *The Prokaryotes: Alphaproteobacteria and*  
671 *Betaproteobacteria.* Springer, Berlin, Heidelberg, pp. 759–776.  
672 [https://doi.org/10.1007/978-3-642-30197-1\\_239](https://doi.org/10.1007/978-3-642-30197-1_239)
- 673 Convey, P., Bindschadler, R., di Prisco, G., Fahrbach, E., Gutt, J., Hodgson, D.A., Mayewski,  
674 P.A., Summerhayes, C.P., Turner, J., the ACCE Consortium, 2009. Antarctic climate  
675 change and the environment. *Antarct. Sci.* 21, 541–563.  
676 <https://doi.org/10.1017/S0954102009990642>
- 677 Conway, J., Gehlenborg, N., 2019. UpSetR: A More Scalable Alternative to Venn and Euler  
678 Diagrams for Visualizing Intersecting Sets.
- 679 Corteselli, E.M., Aitken, M.D., Singleton, D.R., 2017. Description of *Immundisolibacter*  
680 *cernigliae* gen. nov., sp. nov., a high-molecular-weight polycyclic aromatic hydrocarbon-  
681 degrading bacterium within the class Gammaproteobacteria, and proposal of  
682 *Immundisolibacterales* ord. nov. and *Immundisolibacteraceae* fam. nov. *Int. J. Syst. Evol.*  
683 *Microbiol.* 67, 925–931. <https://doi.org/10.1099/ijsem.0.001714>
- 684 Cowan, D.A., Makhalanyane, T.P., Dennis, P.G., Hopkins, D.W., 2014. Microbial ecology and  
685 biogeochemistry of continental Antarctic soils. *Front. Microbiol.* 5.  
686 <https://doi.org/10.3389/fmicb.2014.00154>
- 687 Cuthbertson, L., Amores-Arrocha, H., Malard, L.A., Els, N., Sattler, B., Pearce, D.A., 2017.  
688 Characterisation of Arctic Bacterial Communities in the Air above Svalbard. *Biology* 6.  
689 <https://doi.org/10.3390/biology6020029>
- 690 Dang, H., Zhu, H., Wang, J., Li, T., 2009. Extracellular hydrolytic enzyme screening of culturable  
691 heterotrophic bacteria from deep-sea sediments of the Southern Okinawa Trough. *World*  
692 *J. Microbiol. Biotechnol.* 25, 71–79. <https://doi.org/10.1007/s11274-008-9865-5>
- 693 Dedysh, S.N., Damsté, J.S.S., 2018. Acidobacteria, in: ELS. American Cancer Society, pp. 1–10.  
694 <https://doi.org/10.1002/9780470015902.a0027685>
- 695 DeLorenzo, S., Bräuer, S.L., Edgmont, C.A., Herfort, L., Tebo, B.M., Zuber, P., 2012. Ubiquitous  
696 Dissolved Inorganic Carbon Assimilation by Marine Bacteria in the Pacific Northwest  
697 Coastal Ocean as Determined by Stable Isotope Probing. *PLOS ONE* 7, e46695.  
698 <https://doi.org/10.1371/journal.pone.0046695>
- 699 Edwards, A., Mur, L.A.J., Girdwood, S.E., Anesio, A.M., Stibal, M., Rassner, S.M.E., Hell, K.,

- 700 Pachebat, J.A., Post, B., Bussell, J.S., Cameron, S.J.S., Griffith, G.W., Hodson, A.J.,  
701 Sattler, B., 2014. Coupled cryoconite ecosystem structure-function relationships are  
702 revealed by comparing bacterial communities in alpine and Arctic glaciers. *FEMS*  
703 *Microbiol. Ecol.* 89, 222–237. <https://doi.org/10.1111/1574-6941.12283>
- 704 Ferrera, I., Banta, A.B., Reysenbach, A.-L., 2014. Spatial patterns of Aquificales in deep-sea vents  
705 along the Eastern Lau Spreading Center (SW Pacific). *Syst. Appl. Microbiol.* 37, 442–448.  
706 <https://doi.org/10.1016/j.syapm.2014.04.002>
- 707 Fincker, M., Huber, J.A., Orphan, V.J., Rappé, M.S., Teske, A., Spormann, A.M., 2020. Metabolic  
708 strategies of marine seafloor Chloroflexi inferred from genome reconstructions.  
709 *Environ. Microbiol.* 22, 3188–3204. <https://doi.org/10.1111/1462-2920.15061>
- 710 Foong, C.P., Wong Vui Ling, C.M., González, M., 2010. Metagenomic analyses of the dominant  
711 bacterial community in the Fildes Peninsula, King George Island (South Shetland Islands).  
712 *Polar Sci., Antarctic Biology in the 21st Century - Advances in and beyond IPY 4*, 263–  
713 273. <https://doi.org/10.1016/j.polar.2010.05.010>
- 714 Franco, D.C., Signori, C.N., Duarte, R.T.D., Nakayama, C.R., Campos, L.S., Pellizari, V.H., 2017.  
715 High Prevalence of Gammaproteobacteria in the Sediments of Admiralty Bay and North  
716 Bransfield Basin, Northwestern Antarctic Peninsula. *Front. Microbiol.* 8.  
717 <https://doi.org/10.3389/fmicb.2017.00153>
- 718 Friedmann, E.I., Hua, M., Ocampo-Friedmann, R., 1988. Cryptoendolithic lichen and  
719 cyanobacterial communities of the Ross Desert, Antarctica. *Polarforschung* 58, 251–259.
- 720 Golyshin, P.N., Chernikova, T.N., Abraham, W.-R., Lünsdorf, H., Timmis, K.N., Yakimov, M.M.  
721 2002, n.d. *Oleiphilaceae* fam. nov., to include *Oleiphilus messinensis* gen. nov., sp. nov., a  
722 novel marine bacterium that obligately utilizes hydrocarbons. *Int. J. Syst. Evol. Microbiol.*  
723 52, 901–911. <https://doi.org/10.1099/00207713-52-3-901>
- 724 Gran-Scheuch, A., Ramos-Zuñiga, J., Fuentes, E., Bravo, D., Pérez-Donoso, J.M., 2020. Effect of  
725 Co-contamination by PAHs and Heavy Metals on Bacterial Communities of Diesel  
726 Contaminated Soils of South Shetland Islands, Antarctica. *Microorganisms* 8, 1749.  
727 <https://doi.org/10.3390/microorganisms8111749>
- 728 Harding, T., Jungblut, A.D., Lovejoy, C., Vincent, W.F., 2011. Microbes in High Arctic Snow and  
729 Implications for the Cold Biosphere. *Appl. Environ. Microbiol.* 77, 3234–3243.  
730 <https://doi.org/10.1128/AEM.02611-10>
- 731 Hell, K., Edwards, A., Zarsky, J., Podmirseg, S.M., Girdwood, S., Pachebat, J.A., Insam, H.,  
732 Sattler, B., 2013. The dynamic bacterial communities of a melting High Arctic glacier  
733 snowpack. *ISME J.* 7, 1814–1826. <https://doi.org/10.1038/ismej.2013.51>
- 734 Herbold, C.W., McDonald, I.R., Cary, S.C., 2014. Microbial Ecology of Geothermal Habitats in  
735 Antarctica, in: Cowan, D.A. (Ed.), *Antarctic Terrestrial Microbiology: Physical and*  
736 *Biological Properties of Antarctic Soils*. Springer, Berlin, Heidelberg, pp. 181–215.  
737 [https://doi.org/10.1007/978-3-642-45213-0\\_10](https://doi.org/10.1007/978-3-642-45213-0_10)
- 738 Hirsch, P., Hoffmann, B., Gallikowski, C.C., Mevs, U., Siebert, J., Sittig, M., 1988. Diversity and  
739 identification of heterotrophic bacteria from Antarctic Rocks of the McMurdo Dry Valleys

- 740 (Ross Desert). Suppl. Hirsch P Al 1988 37 Divers. Identif. Heterotrophs Antarct. Rocks  
741 McMurdo Dry Val. Ross Desert Polarforsch. 5823 261-269 Hdl10013epic29622d001.  
742 <https://doi.org/10.1594/PANGAEA.763324>
- 743 Hodson, A.J., Nowak, A., Cook, J., Sabacka, M., Wharfe, E.S., Pearce, D.A., Convey, P., Vieira,  
744 G., 2017. Microbes influence the biogeochemical and optical properties of maritime  
745 Antarctic snow. *J. Geophys. Res. Biogeosciences* 122, 1456–1470.  
746 <https://doi.org/10.1002/2016JG003694>
- 747 Hoshino, T., Doi, H., Uramoto, G.-I., Wörmer, L., Adhikari, R.R., Xiao, N., Morono, Y., D’Hondt,  
748 S., Hinrichs, K.-U., Inagaki, F., 2020. Global diversity of microbial communities in marine  
749 sediment. *Proc. Natl. Acad. Sci.* 117, 27587–27597.  
750 <https://doi.org/10.1073/pnas.1919139117>
- 751 Jansson, J.K., Taş, N., 2014. The microbial ecology of permafrost. *Nat. Rev. Microbiol.* 12, 414–  
752 425. <https://doi.org/10.1038/nrmicro3262>
- 753 Kallmeyer, J., Pockalny, R., Adhikari, R.R., Smith, D.C., D’Hondt, S., 2012. Global distribution  
754 of microbial abundance and biomass in subseafloor sediment. *Proc. Natl. Acad. Sci.* 109,  
755 16213–16216. <https://doi.org/10.1073/pnas.1203849109>
- 756 Katoh, K., Misawa, K., Kuma, K., Miyata, T., 2002. MAFFT: a novel method for rapid multiple  
757 sequence alignment based on fast Fourier transform. *Nucleic Acids Res.* 30, 3059–3066.  
758 <https://doi.org/10.1093/nar/gkf436>
- 759 Kurahashi, M., Fukunaga, Y., Sakiyama, Y., Harayama, S., Yokota, Akira, 2011. *Iamia*  
760 *majanoهامensis* gen. nov., sp. nov., an actinobacterium isolated from sea cucumber  
761 *Holothuria edulis*, and proposal of *Iamiaceae* fam. nov. *Int. J. Syst. Evol. Microbiol.* 59,  
762 869–873. <https://doi.org/10.1099/ijs.0.005611-0>
- 763 Larose, C., Dommergue, A., Vogel, T.M., 2013. Microbial nitrogen cycling in Arctic snowpacks.  
764 *Environ. Res. Lett.* 8, 035004. <https://doi.org/10.1088/1748-9326/8/3/035004>
- 765 Learman, D.R., Henson, M.W., Thrash, J.C., Temperton, B., Brannock, P.M., Santos, S.R.,  
766 Mahon, A.R., Halanych, K.M., 2016. Biogeochemical and Microbial Variation across 5500  
767 km of Antarctic Surface Sediment Implicates Organic Matter as a Driver of Benthic  
768 Community Structure. *Front. Microbiol.* 7, 284. <https://doi.org/10.3389/fmicb.2016.00284>
- 769 Lezcano, M.Á., Moreno-Paz, M., Carrizo, D., Prieto-Ballesteros, O., Fernández-Martínez, M.Á.,  
770 Sánchez-García, L., Blanco, Y., Puente-Sánchez, F., de Diego-Castilla, G., García-  
771 Villadangos, M., Fairén, A.G., Parro, V., 2019. Biomarker Profiling of Microbial Mats in  
772 the Geothermal Band of Cerro Caliente, Deception Island (Antarctica): Life at the Edge of  
773 Heat and Cold. *Astrobiology* 19, 1490–1504. <https://doi.org/10.1089/ast.2018.2004>
- 774 Li, J., Gu, X., Gui, Y., 2020. Prokaryotic Diversity and Composition of Sediments From Prydz  
775 Bay, the Antarctic Peninsula Region, and the Ross Sea, Southern Ocean. *Front. Microbiol.*  
776 11. <https://doi.org/10.3389/fmicb.2020.00783>
- 777 Lopatina, A., Medvedeva, S., Shmakov, S., Logacheva, M.D., Krylenkov, V., Severinov, K., 2016.  
778 Metagenomic Analysis of Bacterial Communities of Antarctic Surface Snow. *Front.*  
779 *Microbiol.* 7, 398. <https://doi.org/10.3389/fmicb.2016.00398>

- 780 Luo, W., Ding, H., Li, H., Ji, Z., Huang, K., Zhao, W., Yu, Y., Zeng, Y., 2020. Molecular diversity  
781 of the microbial community in coloured snow from the Fildes Peninsula (King George  
782 Island, Maritime Antarctica). *Polar Biol.* 43, 1391–1405. [https://doi.org/10.1007/s00300-](https://doi.org/10.1007/s00300-020-02716-0)  
783 [020-02716-0](https://doi.org/10.1007/s00300-020-02716-0)
- 784 Maccario, L., Vogel, T.M., Larose, C., 2014. Potential drivers of microbial community structure  
785 and function in Arctic spring snow. *Front. Microbiol.* 5.  
786 <https://doi.org/10.3389/fmicb.2014.00413>
- 787 Makhalanyane, T.P., Valverde, A., Birkeland, N.-K., Cary, S.C., Marla Tuffin, I., Cowan, D.A.,  
788 2013. Evidence for successional development in Antarctic hypolithic bacterial  
789 communities. *ISME J.* 7, 2080–2090. <https://doi.org/10.1038/ismej.2013.94>
- 790 Malard, L.A., Šabacká, M., Magiopoulos, I., Mowlem, M., Hodson, A., Tranter, M., Siegert, M.J.,  
791 Pearce, D.A., 2019. Spatial Variability of Antarctic Surface Snow Bacterial Communities.  
792 *Front. Microbiol.* 10. <https://doi.org/10.3389/fmicb.2019.00461>
- 793 McCammon, S.A., Bowman, J.P., 2000. Taxonomy of Antarctic Flavobacterium species:  
794 description of *Flavobacterium gillisiae* sp. nov., *Flavobacterium tegetincola* sp. nov., and  
795 *Flavobacterium xanthum* sp. nov., nom. rev. and reclassification of [*Flavobacterium*]  
796 *salegens* as *Salegentibacter salegens* gen. nov., comb. nov. *Int. J. Syst. Evol. Microbiol.* 50  
797 Pt 3, 1055–1063. <https://doi.org/10.1099/00207713-50-3-1055>
- 798 McMurdie, P.J., Holmes, S., 2012. Phyloseq: a bioconductor package for handling and analysis of  
799 high-throughput phylogenetic sequence data. *Pac. Symp. Biocomput. Pac. Symp.*  
800 *Biocomput.* 235–246.
- 801 Michaud, L., Giudice, A.L., Mysara, M., Monsieurs, P., Raffa, C., Leys, N., Amalfitano, S., Houdt,  
802 R.V., 2014. Snow Surface Microbiome on the High Antarctic Plateau (DOME C). *PLOS*  
803 *ONE* 9, e104505. <https://doi.org/10.1371/journal.pone.0104505>
- 804 Nakagawa, T., Takai, K., Suzuki, Y., Hirayama, H., Konno, U., Tsunogai, U., Horikoshi, K., 2006.  
805 Geomicrobiological exploration and characterization of a novel deep-sea hydrothermal  
806 system at the TOTO caldera in the Mariana Volcanic Arc. *Environ. Microbiol.* 8, 37–49.  
807 <https://doi.org/10.1111/j.1462-2920.2005.00884.x>
- 808 Parkes, R.J., Cragg, B., Roussel, E., Webster, G., Weightman, A., Sass, H., 2014. A review of  
809 prokaryotic populations and processes in sub-seafloor sediments, including  
810 biosphere:geosphere interactions. *Mar. Geol.*, 50th Anniversary Special Issue 352, 409–  
811 425. <https://doi.org/10.1016/j.margeo.2014.02.009>
- 812 Pascual, J., Huber, K.J., Overmann, J., 2018. Pyrinomonadaceae, in: *Bergey's Manual of*  
813 *Systematics of Archaea and Bacteria*. American Cancer Society, pp. 1–4.  
814 <https://doi.org/10.1002/9781118960608.fbm00310>
- 815 Pearce, D.A., Hughes, K.A., Lachlan-Cope, T., Harangozo, S.A., Jones, A.E., 2010. Biodiversity  
816 of air-borne microorganisms at Halley Station, Antarctica. *Extrem. Life Extreme Cond.* 14,  
817 145–159. <https://doi.org/10.1007/s00792-009-0293-8>
- 818 Pearce, D.A., Newsham, K., Thorne, M., Calvo-Bado, L., Krsek, M., Laskaris, P., Hodson, A.,  
819 Wellington, E.M.H., 2012. Metagenomic Analysis of a Southern Maritime Antarctic Soil.



- 820 Front. Microbiol. 3. <https://doi.org/10.3389/fmicb.2012.00403>
- 821 Pereira, O., Hochart, C., Auguet, J.C., Debroas, D., Galand, P.E., 2019. Genomic ecology of  
822 Marine Group II, the most common marine planktonic Archaea across the surface ocean.  
823 MicrobiologyOpen 8, e00852. <https://doi.org/10.1002/mbo3.852>
- 824 Pessi, I.S., Osorio-Forero, C., Gálvez, E.J.C., Simões, F.L., Simões, J.C., Junca, H., Macedo, A.J.,  
825 2015. Distinct composition signatures of archaeal and bacterial phylotypes in the Wanda  
826 Glacier forefield, Antarctic Peninsula. FEMS Microbiol. Ecol. 91, 1–10.  
827 <https://doi.org/10.1093/femsec/fiu005>
- 828 Powell, S.M., Bowman, J.P., Snape, I., Stark, J.S., 2003. Microbial community variation in pristine  
829 and polluted nearshore Antarctic sediments. FEMS Microbiol. Ecol. 45, 135–145.  
830 [https://doi.org/10.1016/S0168-6496\(03\)00135-1](https://doi.org/10.1016/S0168-6496(03)00135-1)
- 831 Price, M.N., Dehal, P.S., Arkin, A.P., 2009. FastTree: Computing Large Minimum Evolution  
832 Trees with Profiles instead of a Distance Matrix. Mol. Biol. Evol. 26, 1641–1650.  
833 <https://doi.org/10.1093/molbev/msp077>
- 834 Price, R.E., Giovannelli, D., 2017. A Review of the Geochemistry and Microbiology of Marine  
835 Shallow-Water Hydrothermal Vents, in: Reference Module in Earth Systems and  
836 Environmental Sciences. Elsevier. <https://doi.org/10.1016/B978-0-12-409548-9.09523-3>
- 837 Quast, C., Pruesse, E., Yilmaz, P., Gerken, J., Schweer, T., Yarza, P., Peplies, J., Glöckner, F.O.,  
838 2013. The SILVA ribosomal RNA gene database project: improved data processing and  
839 web-based tools. Nucleic Acids Res. 41, D590–D596. <https://doi.org/10.1093/nar/gks1219>
- 840 Quince, C., Lanzen, A., Davenport, R.J., Turnbaugh, P.J., 2011. Removing Noise From  
841 Pyrosequenced Amplicons. BMC Bioinformatics 12, 38. <https://doi.org/10.1186/1471-2105-12-38>
- 842
- 843 Ramos, L.R., Vollú, R.E., Jurelevicius, D., Rosado, A.S., Seldin, L., 2019. Firmicutes in different  
844 soils of Admiralty Bay, King George Island, Antarctica. Polar Biol. 42, 2219–2226.  
845 <https://doi.org/10.1007/s00300-019-02596-z>
- 846 Šantl-Temkiv, T., Gosewinkel, U., Starnawski, P., Lever, M., Finster, K., 2018. Aeolian dispersal  
847 of bacteria in southwest Greenland: their sources, abundance, diversity and physiological  
848 states. FEMS Microbiol. Ecol. 94. <https://doi.org/10.1093/femsec/fiy031>
- 849 Sharp, C.E., Brady, A.L., Sharp, G.H., Grasby, S.E., Stott, M.B., Dunfield, P.F., 2014. Humboldt's  
850 spa: microbial diversity is controlled by temperature in geothermal environments. ISME J.  
851 8, 1166–1174. <https://doi.org/10.1038/ismej.2013.237>
- 852 Siebert, J., Hirsch, P., 1988. Characterization of 15 selected coccal bacteria isolated from Antarctic  
853 rock and soil samples from the McMurdo-Dry Valleys (South-Victoria Land). Polar Biol.  
854 9, 37–44. <https://doi.org/10.1007/BF00441762>
- 855 Siebert, J., Hirsch, P., Hoffmann, B., Gliesche, C.G., Peissl, K., Jendrach, M., 1996.  
856 Cryptoendolithic microorganisms from Antarctic sandstone of Linnaeus Terrace (Asgard  
857 Range): diversity, properties and interactions. Biodivers. Conserv. 5, 1337–1363.  
858 <https://doi.org/10.1007/BF00051982>
- 859 Signori, C.N., Pellizari, V.H., Enrich-Prast, A., Sievert, S.M., 2018. Spatiotemporal dynamics of

- 860 marine bacterial and archaeal communities in surface waters off the northern Antarctic  
861 Peninsula. *Deep Sea Res. Part II Top. Stud. Oceanogr.*, Oceanographic processes and  
862 biological responses around Northern Antarctic Peninsula: a 15-year contribution of the  
863 Brazilian High Latitude Oceanography Group 149, 150–160.  
864 <https://doi.org/10.1016/j.dsr2.2017.12.017>
- 865 Signori, C.N., Thomas, F., Enrich-Prast, A., Pollery, R.C.G., Sievert, S.M., 2014. Microbial  
866 diversity and community structure across environmental gradients in Bransfield Strait,  
867 Western Antarctic Peninsula. *Front. Microbiol.* 5.  
868 <https://doi.org/10.3389/fmicb.2014.00647>
- 869 Soo, R.M., Wood, S.A., Grzymski, J.J., McDonald, I.R., Cary, S.C., 2009. Microbial biodiversity  
870 of thermophilic communities in hot mineral soils of Tramway Ridge, Mount Erebus,  
871 Antarctica. *Environ. Microbiol.* 11, 715–728. [https://doi.org/10.1111/j.1462-](https://doi.org/10.1111/j.1462-2920.2009.01859.x)  
872 [2920.2009.01859.x](https://doi.org/10.1111/j.1462-2920.2009.01859.x)
- 873 Stetter, K.O., König, H., Stackebrandt, E., 1983. *Pyrodictium* gen. nov., a New Genus of  
874 Submarine Disc-Shaped Sulphur Reducing Archaeobacteria Growing Optimally at 105°C.  
875 *Syst. Appl. Microbiol.* 4, 535–551. [https://doi.org/10.1016/S0723-2020\(83\)80011-3](https://doi.org/10.1016/S0723-2020(83)80011-3)
- 876 Takai, K., Komatsu, T., Inagaki, F., Horikoshi, K., 2001. Distribution of Archaea in a Black  
877 Smoker Chimney Structure. *Appl. Environ. Microbiol.* 67, 3618–3629.  
878 <https://doi.org/10.1128/AEM.67.8.3618-3629.2001>
- 879 Takai, K., Sako, Y., 1999. A molecular view of archaeal diversity in marine and terrestrial hot  
880 water environments. *FEMS Microbiol. Ecol.* 28, 177–188. [https://doi.org/10.1111/j.1574-](https://doi.org/10.1111/j.1574-6941.1999.tb00573.x)  
881 [6941.1999.tb00573.x](https://doi.org/10.1111/j.1574-6941.1999.tb00573.x)
- 882 Thompson, L.R., Sanders, J.G., McDonald, D., Amir, A., Ladau, J., Locey, K.J., Prill, R.J.,  
883 Tripathi, A., Gibbons, S.M., Ackermann, G., Navas-Molina, J.A., Janssen, S., Kopylova,  
884 E., Vázquez-Baeza, Y., González, A., Morton, J.T., Mirarab, S., Zech Xu, Z., Jiang, L.,  
885 Haroon, M.F., Kanbar, J., Zhu, Q., Jin Song, S., Kosciulek, T., Bokulich, N.A., Lefler, J.,  
886 Brislawn, C.J., Humphrey, G., Owens, S.M., Hampton-Marcell, J., Berg-Lyons, D.,  
887 McKenzie, V., Fierer, N., Fuhrman, J.A., Clauset, A., Stevens, R.L., Shade, A., Pollard,  
888 K.S., Goodwin, K.D., Jansson, J.K., Gilbert, J.A., Knight, R., 2017. A communal catalogue  
889 reveals Earth’s multiscale microbial diversity. *Nature* 551, 457–463.  
890 <https://doi.org/10.1038/nature24621>
- 891 Tonelli, M., Signori, C.N., Bendia, A.G., Neiva, J., Ferrero, B., Pellizari, V.H., Wainer, I., 2021.  
892 Climate projections for the Southern Ocean reveal impacts in the marine microbial  
893 communities following increases in sea surface temperature. *Front. Mar. Sci.* 8.  
894 <https://doi.org/10.3389/fmars.2021.636226>
- 895 Ue, H., Matsuo, Y., Kasai, H., Yokota, A., 2011. *Demequina globuliformis* sp. nov., *Demequina*  
896 *oxidastica* sp. nov. and *Demequina aurantiaca* sp. nov., actinobacteria isolated from marine  
897 environments, and proposal of *Demequinaceae* fam. nov. *Int. J. Syst. Evol. Microbiol.* 61,  
898 1322–1329. <https://doi.org/10.1099/ijs.0.024299-0>
- 899 Vishnivetskaya, T.A., Kathariou, S., Tiedje, J.M., 2009. The *Exiguobacterium* genus: biodiversity

- 900 and biogeography. *Extremophiles* 13, 541–555. [https://doi.org/10.1007/s00792-009-0243-](https://doi.org/10.1007/s00792-009-0243-5)  
901 5
- 902 Wang, N.F., Zhang, T., Zhang, F., Wang, E.T., He, J.F., Ding, H., Zhang, B.T., Liu, J., Ran, X.B.,  
903 Zang, J.Y., 2015. Diversity and structure of soil bacterial communities in the Fildes Region  
904 (maritime Antarctica) as revealed by 454 pyrosequencing. *Front. Microbiol.* 6.  
905 <https://doi.org/10.3389/fmicb.2015.01188>
- 906 Ward, L., Taylor, M.W., Power, J.F., Scott, B.J., McDonald, I.R., Stott, M.B., 2017. Microbial  
907 community dynamics in Inferno Crater Lake, a thermally fluctuating geothermal spring.  
908 *ISME J.* 11, 1158–1167. <https://doi.org/10.1038/ismej.2016.193>
- 909 Yakimov, M.M., Golyshin, P.N., 2014. The Family Oleiphilaceae, in: Rosenberg, E., DeLong,  
910 E.F., Lory, S., Stackebrandt, E., Thompson, F. (Eds.), *The Prokaryotes:*  
911 *Gammaproteobacteria.* Springer, Berlin, Heidelberg, pp. 529–533.  
912 [https://doi.org/10.1007/978-3-642-38922-1\\_285](https://doi.org/10.1007/978-3-642-38922-1_285)
- 913 Yan, P., Hou, S., Chen, T., Ma, X., Zhang, S., 2012. Culturable bacteria isolated from snow cores  
914 along the 1300 km traverse from Zhongshan Station to Dome A, East Antarctica. *Extrem.*  
915 *Life Extreme Cond.* <https://doi.org/10.1007/s00792-012-0434-3>
- 916 Yilmaz, P., Parfrey, L.W., Yarza, P., Gerken, J., Priesse, E., Quast, C., Schweer, T., Peplies, J.,  
917 Ludwig, W., Glöckner, F.O., 2014. The SILVA and “All-species Living Tree Project  
918 (LTP)” taxonomic frameworks. *Nucleic Acids Res.* 42, D643–D648.  
919 <https://doi.org/10.1093/nar/gkt1209>
- 920 Zarsky, J.D., Stibal, M., Hodson, A., Sattler, B., Schostag, M., Hansen, L.H., Jacobsen, C.S.,  
921 Psenner, R., 2013. Large cryoconite aggregates on a Svalbard glacier support a diverse  
922 microbial community including ammonia-oxidizing archaea. *Environ. Res. Lett.* 8,  
923 035044. <https://doi.org/10.1088/1748-9326/8/3/035044>
- 924 Zeng, X., Alain, K., Shao, Z., 2021. Microorganisms from deep-sea hydrothermal vents. *Mar. Life*  
925 *Sci. Technol.* <https://doi.org/10.1007/s42995-020-00086-4>
- 926  
927  
928  
929  
930  
931  
932  
933  
934  
935  
936  
937  
938  
939



940 Figure 1

941

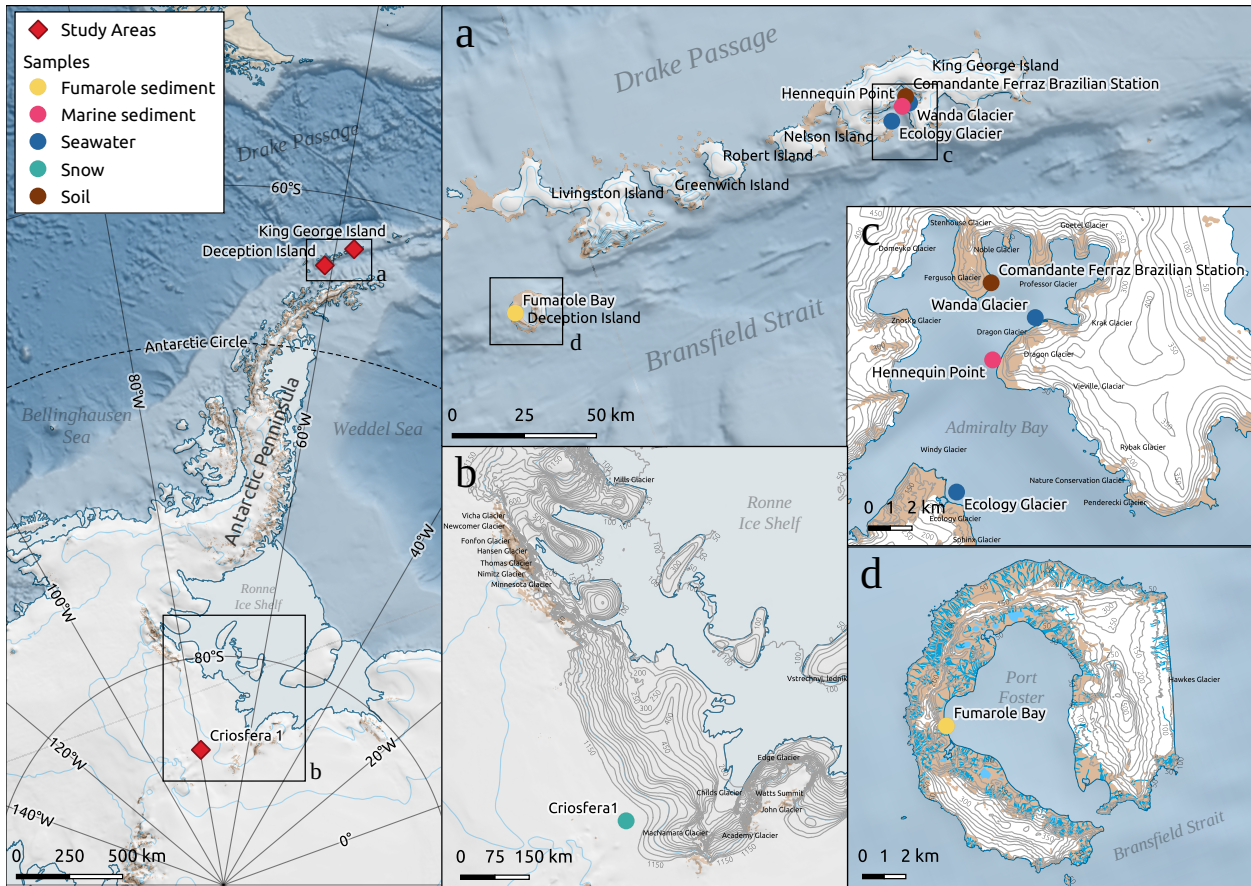

942

943

944

945

946

947

948

949

950

951

952

953

954

955

956

957

958

959

960 Figure 2  
961

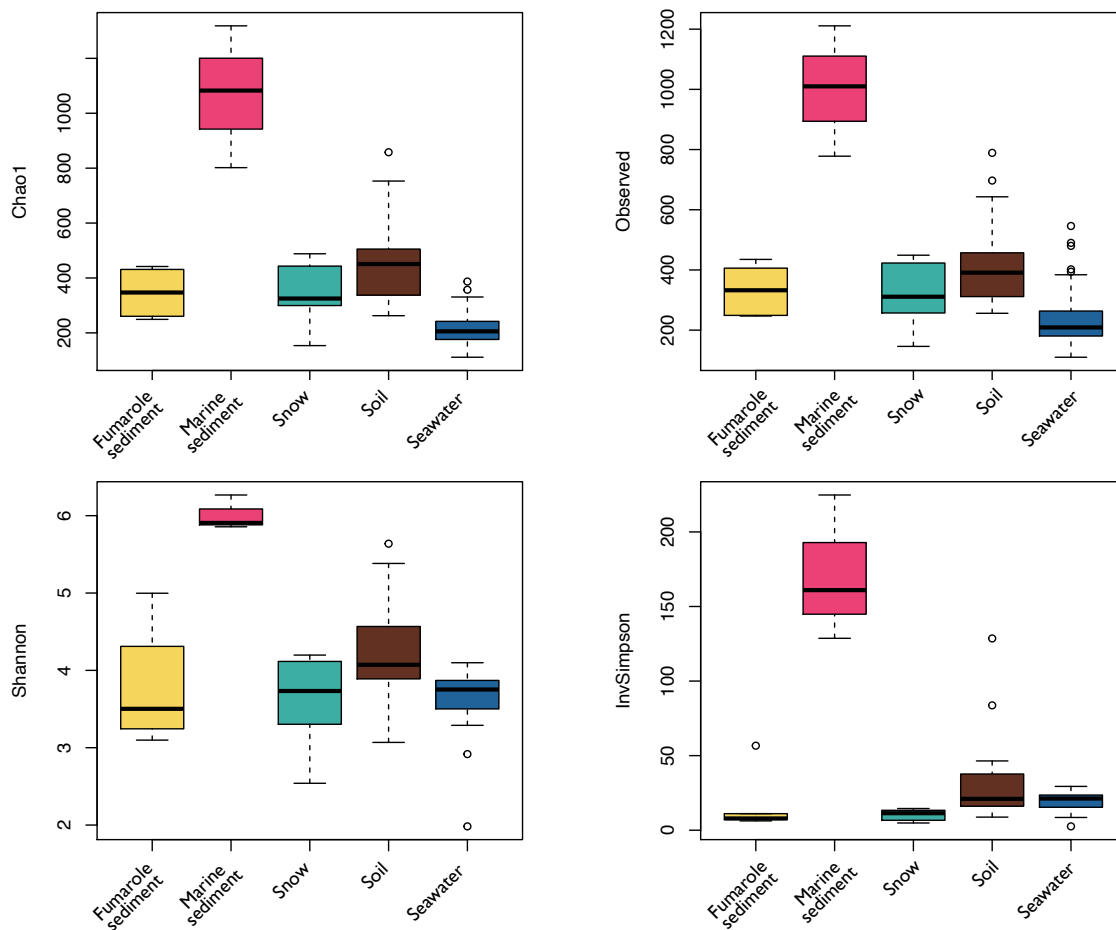

962  
963  
964  
965  
966  
967  
968  
969  
970  
971  
972  
973  
974  
975  
976  
977  
978

979 Figure 3.  
980

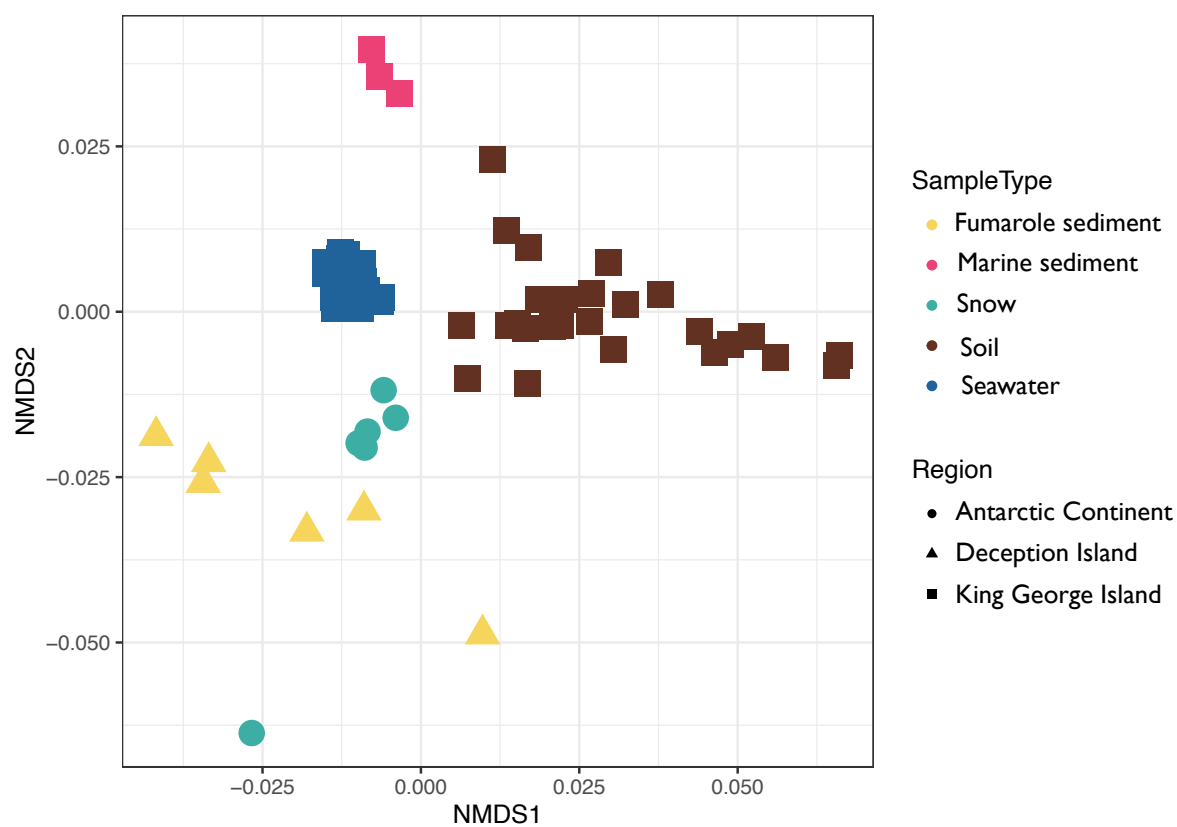

981  
982  
983  
984  
985  
986  
987  
988  
989  
990  
991  
992  
993  
994  
995  
996  
997

998 Figure 4  
999

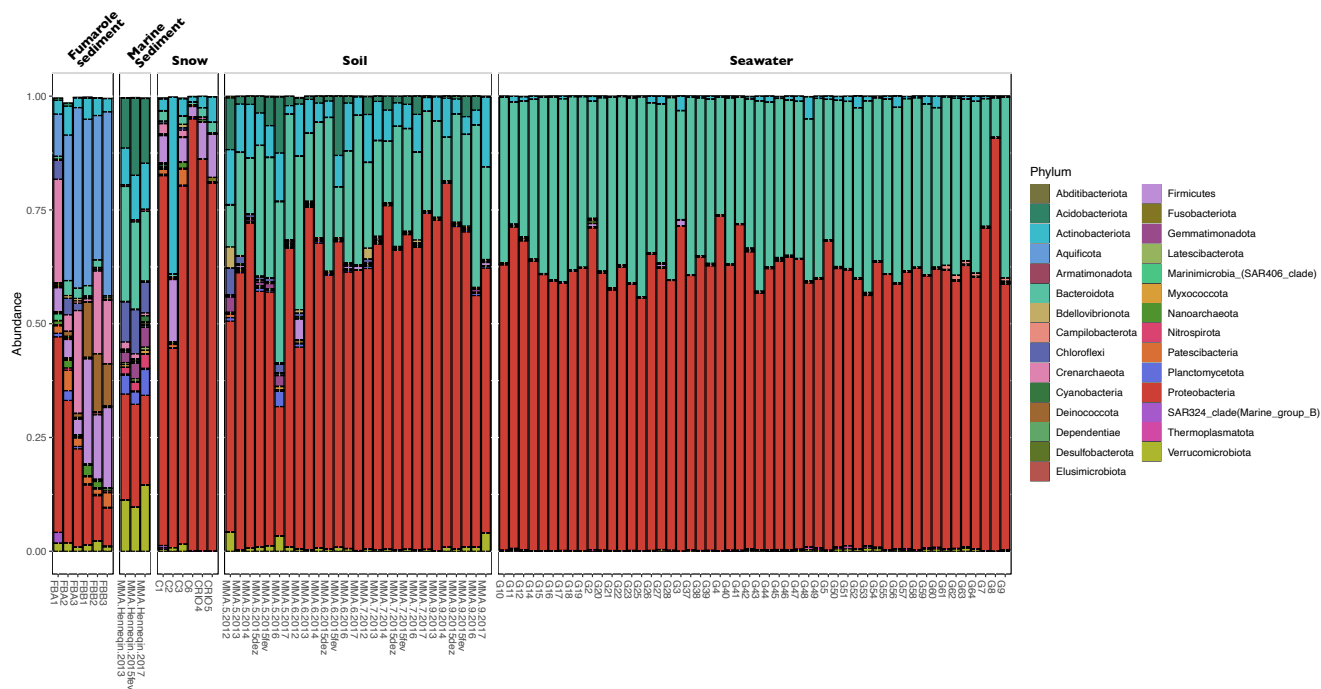

1000  
1001  
1002  
1003  
1004  
1005  
1006  
1007  
1008  
1009  
1010  
1011  
1012  
1013  
1014  
1015  
1016  
1017  
1018  
1019  
1020  
1021  
1022

1023 Figure 5

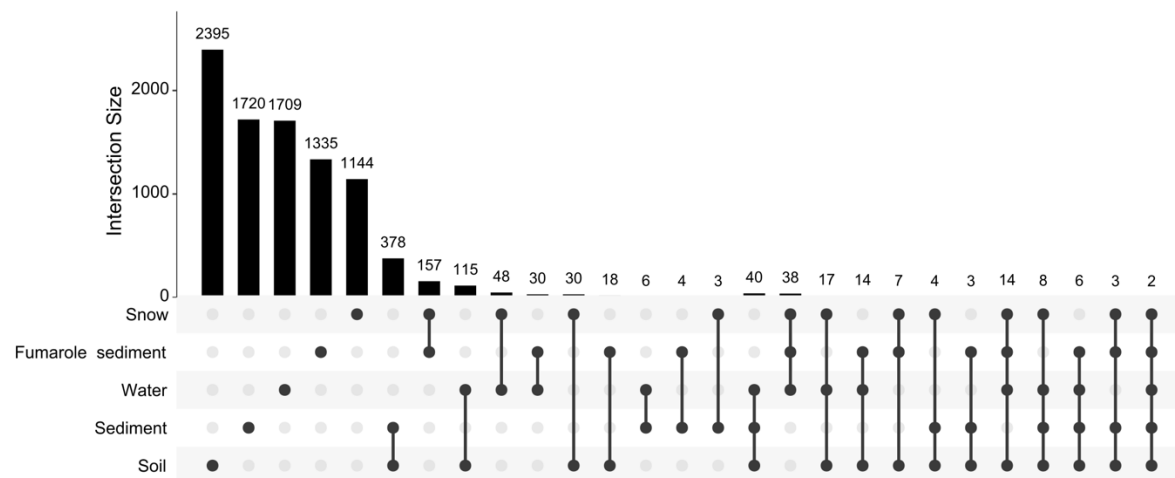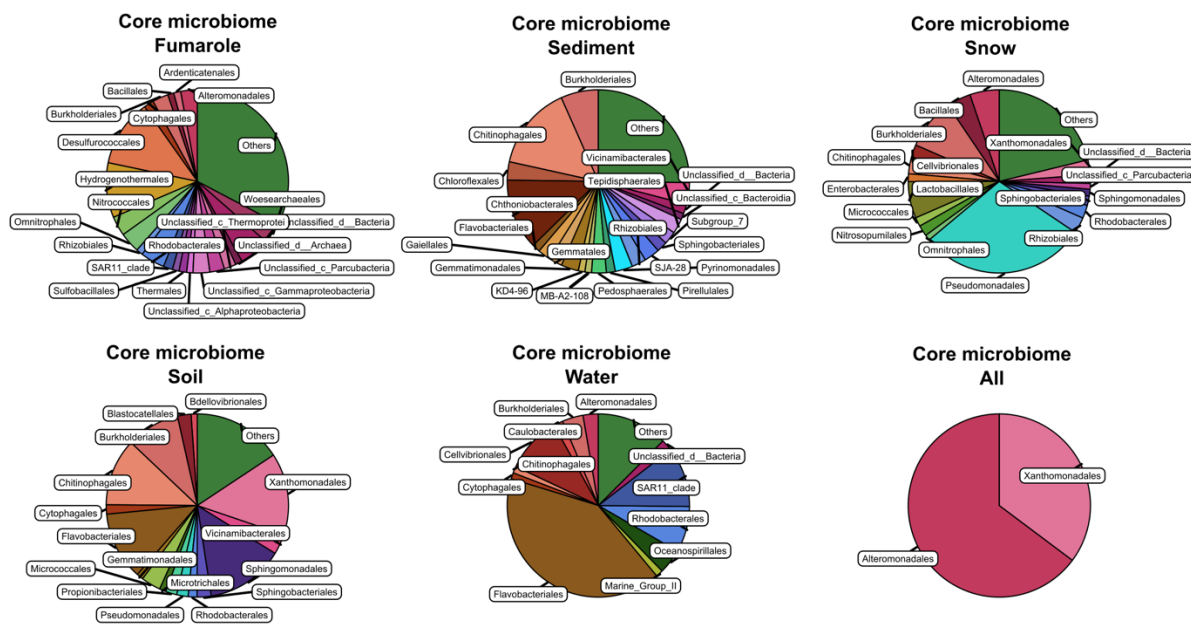

1024  
1025  
1026  
1027  
1028  
1029  
1030  
1031  
1032  
1033  
1034  
1035  
1036

1037 Figure 6  
1038

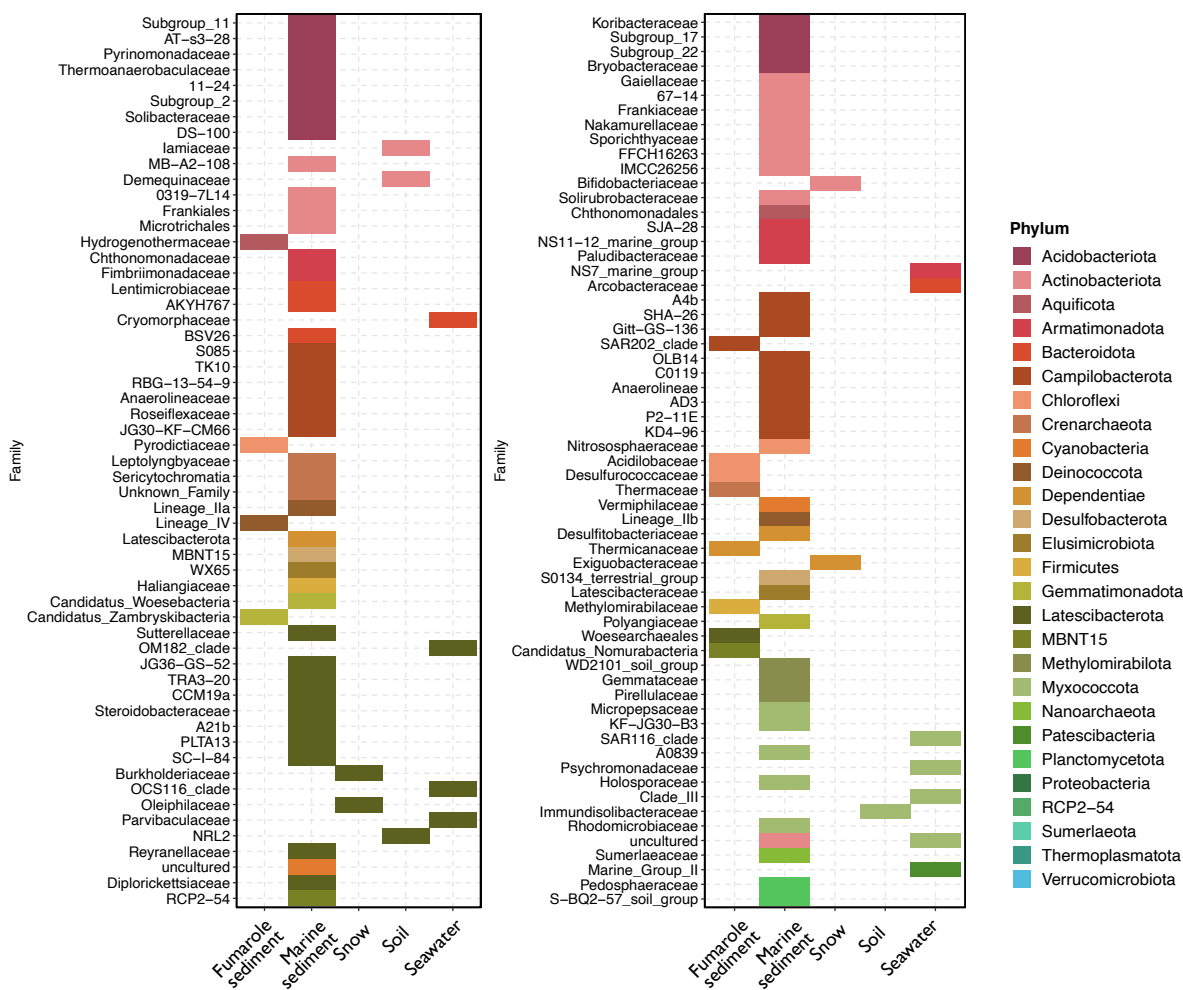

1039  
1040  
1041  
1042  
1043
